# Supplementary material for: A putative R3 MYB repressor is the candidate gene underlying atroviolacium, a locus for anthocyanin pigmentation in tomato fruit
Source: PubMed Central journal article supplement (PMC5854135; doi:10.1093/jxb/erx382), 2017-11-25
Supplement: erx382_suppl_supplementary_material.pdf [file erx382_suppl_supplementary_material.pdf]

**A putative *R3 MYB* repressor is the candidate gene underlying *atroviolacium*, a locus for anthocyanin pigmentation in tomato fruit**

Xue Cao<sup>1,†</sup>, Zhengkun Qiu<sup>2,†</sup>, Xiaotian Wang<sup>1</sup>, Tong Van Giang<sup>1</sup>, Xiaolin Liu<sup>1</sup>, Jing Wang<sup>2</sup>, Xiaoxuan Wang<sup>1</sup>, Jianchang Gao<sup>1</sup>, Yanmei Guo<sup>1</sup>, Yongchen Du<sup>1</sup>, Guoping Wang<sup>2</sup>, Zejun Huang<sup>1,\*</sup>

<sup>1</sup> The Key Laboratory of Biology and Genetic Improvement of Horticultural Crops of the Ministry of Agriculture, Institute of Vegetables and Flowers, Chinese Academy of Agricultural Sciences, Beijing 100086, China

<sup>2</sup> Department of Vegetable Science, College of Horticulture, South China Agricultural University, Guangzhou 510642, China

<sup>†</sup> These authors contributed equally to this study

\* Corresponding author, E-mail: [huangzejun@caas.cn](mailto:huangzejun@caas.cn); Tel: 86-10-82109538

**Supplementary data**

**A**

|                    |                                                                               |     |
|--------------------|-------------------------------------------------------------------------------|-----|
| <i>SIMYBATV-X1</i> | ATGGCAGATTGGAATAGATCAAGCACATCAGATAATGCCTCAGTGGTCTCACCTGAT-----TCGACCCGAGTGGTT | 72  |
| <i>sImybatv-x1</i> | ATGGCAGATTGGAATAGATCAAGCACATCAGATAATGCCTCAGTGGTCTCACCTGATAGATTCGACCCGAGTGGTT  | 76  |
| <i>SIMYBATV-X1</i> | GCATTAGAGACTACCAACGAAGAAACCTCTAAACTTGAATTTTCAGAAGATGAAGAAATGCTCATTGCTAAAAATGT | 148 |
| <i>sImybatv-x1</i> | GCATTAGAGACTACCAACGAAGAAACCTCTAAACTTGAATTTTCAGAAGATGAAGAAATGCTCATTGCTAAAAATGT | 152 |
| <i>SIMYBATV-X1</i> | TCAGCTTGGTTAGAGAGAGGTGGTCATTAATTGCTGGAAGAATCCCAAGGAAGAAATGCTGATGAGATTGAAAAATA | 224 |
| <i>sImybatv-x1</i> | TCAGCTTGGTTAGAGAGAGGTGGTCATTAATTGCTGGAAGAATCCTAGGAAGAAATGCTGATGAGATTGAAAAATA  | 228 |
| <i>SIMYBATV-X1</i> | TTGAAATCAAATACTCCAAAAGCCAGGAGGAAATACAGGCCCAATCTCAAGATGAAGCTCATGGCATTAGATTG    | 300 |
| <i>sImybatv-x1</i> | TTGAAATCAAATACTCCAAAAGCCAGGAGGAAATACAGGCCCAATCTCAAGATGAAGCTCATGGCATTAGATTG    | 304 |
| <i>SIMYBATV-X1</i> | ATAGAGAAAACCTGGGCCTTCAACGGGGCACCCCTCAGCAGTGTGTTTTCCAGAAAAAAGCCCATATCTGTCTGTC  | 376 |
| <i>sImybatv-x1</i> | ATAGAGAAAACCTGGGCCTTCAACGGGGCACCCCTCAGCAGTGTGTTTTCCAGAAAAAAGCCCATATCTGTCTGTC  | 380 |
| <i>SIMYBATV-X1</i> | AACCTTCAGATATGGGCCTCAACTATTGGGCCCAACAACGAATGGGCCTCAACAGCTATTGGGCCCTAAAAACAAC  | 452 |
| <i>sImybatv-x1</i> | AACCTTCAGATATGGGCCTCAACTATTGGGCCCAACAACGAATGGGCCTCAACAGCTATTGGGCCCTAAAAACAAC  | 456 |
| <i>SIMYBATV-X1</i> | TTGGCCCAATAACATCACTGTAGACCAAAAGTTAGTTAACCCAGCCCAAGACCAATAAAACCAATAA           | 519 |
| <i>sImybatv-x1</i> | TTGGCCCAATAACATCACTGTAGACCAAAAGTTAGTTAACCCAGCCCAAGACCAATAAAACCAATAA           | 523 |

**B**

|                    |                                                                               |     |
|--------------------|-------------------------------------------------------------------------------|-----|
| <i>SIMYBATV-X2</i> | ATGGCAGATTGGAATAGATCAAGCACATCAGATAATGCCTCAGTGGTCTCACCTGAT-----TCGACCCGAGTGGTT | 72  |
| <i>sImybatv-x2</i> | ATGGCAGATTGGAATAGATCAAGCACATCAGATAATGCCTCAGTGGTCTCACCTGATAGATTCGACCCGAGTGGTT  | 76  |
| <i>SIMYBATV-X2</i> | GCATTAGAGACTACCAACGAAGAAACCTCTAAACTTGAATTTTCAGAAGATGAAGAAATGCTCATTGCTAAAAATGT | 148 |
| <i>sImybatv-x2</i> | GCATTAGAGACTACCAACGAAGAAACCTCTAAACTTGAATTTTCAGAAGATGAAGAAATGCTCATTGCTAAAAATGT | 152 |
| <i>SIMYBATV-X2</i> | TCAGCTTGGTTAGAGAGAGGTGGTCATTAATTGCTGGAAGAATCCCAAGGAAGAAATGCTGATGAGATTGAAAAATA | 224 |
| <i>sImybatv-x2</i> | TCAGCTTGGTTAGAGAGAGGTGGTCATTAATTGCTGGAAGAATCCTAGGAAGAAATGCTGATGAGATTGAAAAATA  | 228 |
| <i>SIMYBATV-X2</i> | TTGAAATCAAATACTCCAAAAGCCAGATTTTGGGGTCAATGTAG                                  | 270 |
| <i>sImybatv-x2</i> | TTGAAATCAAATACTCCAAAAGCCAGATTTTGGGGTCAATGTAG                                  | 274 |

**C**

|                    |                                                                               |     |
|--------------------|-------------------------------------------------------------------------------|-----|
| <i>SIMYBATV-X3</i> | ATGGCAGATTGGAATAGATCAAGCACATCAGATAATGCCTCAGTGGTCTCACCTGAT-----TCGACCCGAGTGGTT | 72  |
| <i>sImybatv-x3</i> | ATGGCAGATTGGAATAGATCAAGCACATCAGATAATGCCTCAGTGGTCTCACCTGATAGATTCGACCCGAGTGGTT  | 76  |
| <i>SIMYBATV-X3</i> | GCATTAGAGACTACCAACGAAGAAACCTCTAAACTTGAATTTTCAGAAGATGAAGAAATGCTCATTGCTAAAAATGT | 148 |
| <i>sImybatv-x3</i> | GCATTAGAGACTACCAACGAAGAAACCTCTAAACTTGAATTTTCAGAAGATGAAGAAATGCTCATTGCTAAAAATGT | 152 |
| <i>SIMYBATV-X3</i> | TCAGCTTGGTTAGAGAGAGGTGGTCATTAATTGCTGGAAGAATCCCAAGGAAGAAATGCTGATGAGATTGAAAAATA | 224 |
| <i>sImybatv-x3</i> | TCAGCTTGGTTAGAGAGAGGTGGTCATTAATTGCTGGAAGAATCCTAGGAAGAAATGCTGATGAGATTGAAAAATA  | 228 |
| <i>SIMYBATV-X3</i> | TTGAAATCAAATACTCCAAAAGCCAGTAA                                                 | 255 |
| <i>sImybatv-x3</i> | TTGAAATCAAATACTCCAAAAGCCAGTAA                                                 | 259 |

**Fig. S1** Sequence polymorphism of the coding DNA sequence of *SIMYBATV*. Entire coding sequences were aligned by using Clustal X ver. 2 (Larkin *et al.*, 2007) with default settings, and the conserved nucleotides were shaded by using GeneDoc (2.6) (Nicholas *et al.*, 1997). *SIMYBATV-X1*, *SIMYBATV-X2*, and *SIMYBATV-X3* were three transcripts of the *SIMYBATV* gene from Heinz1706; *sImybatv-x1*, *sImybatv-x2*, and *sImybatv-x3* were three transcripts of the *SIMYBATV* gene from Indigo Rose.

|                          |                                                                                                                                                              |              |
|--------------------------|--------------------------------------------------------------------------------------------------------------------------------------------------------------|--------------|
| Indigo-Rose<br>Heinz1706 | TGCCACCGTTTAATTAATTAAGGACATGTCCAATCTAGTTAATGTTGATTAAGAGTGTAATACGGTTAAAAAGA<br>TGCCACCGTTTAATTAATTAAGGACATGTCCAATCTAGTTAATGTTGATTAAGAGTGTAATACGGTTAAAAAGA     | 75<br>75     |
| Indigo-Rose<br>Heinz1706 | AAAAGAGATACTAATTATTTTTGGGGAAAATATTTGAATCATTAACTAATAGAGGTAGTTTTAACTAAAA<br>AAAAGAGATACTAATTATTTTTGGGGAAAATATTTGAATCATTAACTAATAGAGGTAGTTTTAACTAAAA             | 150<br>150   |
| Indigo-Rose<br>Heinz1706 | TATTAGTAATAGAGATATTTTTGGTATTTGGTTCAATTTACGTAGTTAATTTTTTTTTTAATTTCTTTCAGTA<br>TATTAGTAATAGAGATATTTTTGGTATTTGGTTCAATTTACGTAGTTAATTTTTTTTTTAATTTCTTTCAGTA       | 225<br>225   |
| Indigo-Rose<br>Heinz1706 | AAATATATAAATACTCCTATAGTTAACACTAGGATCGTATTAATAGTTAATACCATACATAAAATTAATATAGG<br>AAATATATAAATACTCCTATAGTTAACACTAGGATCGTATTAATAGTTAATACCATACATAAAATTAATATAGG     | 300<br>300   |
| Indigo-Rose<br>Heinz1706 | AATTTATAGATGTGAATAGCGAATAATAACTCATTATACATAGAGATATAAATGTAAGACAATTATCTCTTAT<br>AATTTATAGATGTGAATAGCGAATAATAACTCATTATACATAGAGATATAAATGTAAGACAATTATCTCTTAT       | 375<br>375   |
| Indigo-Rose<br>Heinz1706 | GATACAATTTTTTTTCTACTAAATTTACATATAGTAAAAACAAGACGAAATTTATACCTTTGTAATCCAT<br>GATACAATTTTTTTTCTACTAAATTTACATATAGTAAAAACAAGACGAAATTTATACCTTTGTAATCCAT             | 450<br>450   |
| Indigo-Rose<br>Heinz1706 | CTTGTCCAATTATGTTGAAGGTATAGACAATTTAATGAGGAAGCAAATCAAGAAAAATGAGCTTCTCTAGTA<br>CTTGTCCAATTATGTTGAAGGTATAGACAATTTAATGAGGAAGCAAATCAAGAAAAATGAGCTTCTCTAGTA         | 525<br>525   |
| Indigo-Rose<br>Heinz1706 | CAGATTTTCAAAGGTTCAAAATGTGATTAACACTAATAAAGCCAAGATGAATTACCTTAAACAAAGGGCATAT<br>CAGATTTTCAAAGGTTCAAAATGTGATTAACACTAATAAAGCCAAGATGAATTACCTTAAACAAAGGGCATAT       | 600<br>600   |
| Indigo-Rose<br>Heinz1706 | GTATGCTGTTAACTAGCAATTCGTCCCTCCGTTTCATATCAGTTTTCATATTTATTTTTAAAAAATTAATTA<br>GTATGCTGTTAACTAGCAATTCGTCCCTCCGTTTCATATCAGTTTTCATATTTATTTTTAAAAAATTAATTA         | 675<br>675   |
| Indigo-Rose<br>Heinz1706 | ACTAATCTTTTCCATAATTTAAAATTC AATTGATACAAAAATTATTATAAATTATAATTTTTTTCTCAAGTCAA<br>ACTAATCTTTTCCATAATTTAAAATTC AATTGATACAAAAATTATTATAAATTATAATTTTTTTCTCAAGTCAA   | 750<br>750   |
| Indigo-Rose<br>Heinz1706 | CATTAATAACAATATGTTTCAGAGGAATCCGCAAATGAAATATAGAGAAGATAAAGTGATGTAGTACTTGTGAT<br>CATTAATAACAATATGTTTCAGAGGAATCCGCAAATGAAATATAGAGAAGATAAAGTGATGTAGTACTTGTGAT     | 825<br>825   |
| Indigo-Rose<br>Heinz1706 | GATTCGTAGAAGTAGATAAATGTTTCTGAAAAACATTGCTTCAACATTCAAGAATAAGAAAACATAGCAACTA<br>GATTCGTAGAAGTAGATAAATGTTTCTGAAAAACATTGCTTCAACATTCAAGAATAAGAAAACATAGCAACTA       | 900<br>900   |
| Indigo-Rose<br>Heinz1706 | AAAAAGGAAGTAGTGAAATCTACAAGAAAGGAACAAAAACAACAAAATAGTGTGATAATAAAAATACAGTAAA<br>AAAAAGGAAGTAGTGAAATCTACAAGAAAGGAACAAAAACAACAAAATAGTGTGATAATAAAAATACAGTAAA       | 975<br>975   |
| Indigo-Rose<br>Heinz1706 | CAATTAAGATAATAGATATGATCCAAAGAAAGAACTATAGTACAATGACAAACACCAATGAGCCCAAACCTCA<br>CAATTAAGATAATAGATATGATCCAAAGAAAGAACTATAGTACAATGACAAACACCAATGAGCCCAAACCTCA       | 1050<br>1050 |
| Indigo-Rose<br>Heinz1706 | AAAATAAGAAAACACTCCACTGTTATTATAATAGACGTCTTCAACCTTTATATATAAAATTATCTATCCTCG<br>AAAATAAGAAAACACTCCACTGTTATTATAATAGACGTCTTCAACCTTTATATATAAAATTATCTATCCTCG         | 1125<br>1125 |
| Indigo-Rose<br>Heinz1706 | CGGATAACCTGAAGTTTGCAATATCCAGTCTGATCACTTTTCTCAATACTTCTTTGCCTACATCTAAATCTTC<br>CGGATAACCTGAAGTTTGCAATATCCAGTCTGATCACTTTTCTCAATACTTCTTTGCCTACATCTAAATCTTC       | 1200<br>1200 |
| Indigo-Rose<br>Heinz1706 | TAGTACAATACCATAATCAACTTCTTGACCTGCTCCCTGGAGCGTGTACATCTCTTCTTTACAAAGGTATAA<br>TAGTACAATACCATAATCAACTTCTTGACCTGCTCCCTGGAGCGTGTACATCTCTTCTTTACAAAGGTATAA         | 1275<br>1275 |
| Indigo-Rose<br>Heinz1706 | ATTTGTAAGGTATAAATTTCTAAACATCCTCATCGCCTCAACATTCTCATTGACTCAACATGTATATCTGAAC<br>ATTTGTAAGGTATAAATTTCTAAACATCCTCATCGCCTCAACATTCTCATTGACTCAACATGTATATCTGAAC       | 1350<br>1350 |
| Indigo-Rose<br>Heinz1706 | ATGAAAGTTCTTGACAAGCTAACATTGGCCTTGATACAACAAAATCTATCTAACTATCACTTAATAAAAAACTTA<br>ATGAAAGTTCTTGACAAGCTAACATTGGCCTTGATACAACAAAATCTATCTAACTATCACTTAATAAAAAACTTA   | 1425<br>1425 |
| Indigo-Rose<br>Heinz1706 | CCTTCAAAGTTTCAATGGTACATTTTATCAAGTAAGACTCCGGATGCAACCTTCCAATTCACTTACCGTACAGTCC<br>CCTTCAAAGTTTCAATGGTACATTTTATCAAGTAAGACTCCGGATGCAACCTTCCAATTCACTTACCGTACAGTCC | 1499<br>1500 |

|                          |                                                                                                                                                             |              |
|--------------------------|-------------------------------------------------------------------------------------------------------------------------------------------------------------|--------------|
| Indigo-Rose<br>Heinz1706 | TGCACCAATACGATGTGTGATATCATCGTCAATATCTCCATTTTCCTCGATTGAAAATCCAATTACTTGAAACT<br>TGCACCAATACGATGTGTGATATCATCGTCAATATCTCCATTTTCCTCGATTGAAAATCCAATACTTGAAACT     | 1574<br>1575 |
| Indigo-Rose<br>Heinz1706 | ATAATGAAAAATATTTGAAATCATGTTATCAAACATACATAGTTTCACTCTCAAAAAATAAAACATGACATA<br>ATAATGAAAAATATTTGAAATCATGTTATCAAACATACATAGTTTCACTCTCAAAAAATAAAACATGACATA        | 1649<br>1650 |
| Indigo-Rose<br>Heinz1706 | CTAATTTGAAACAAAAGAAGCATTTGCTTAGCAGCATTAATAATTAATAAAAAATACTTCTAGTATTGAGGAGT<br>CTAATTTGAAACAAAAGAAGCATTTGCTTAGCAGCATTAATAATTAATAAAAAATACTTCTAGTATTGAGGAGT    | 1724<br>1725 |
| Indigo-Rose<br>Heinz1706 | AGTAACACTTCGTTGTTGGTAAAAATGTTGAAAATAATTTCCAACATAACCAATCGATATTGAGTATCCACTTA<br>AGTAACACTTCGTTGTTGGTAAAAATGTTGAAAATAATTTCCAACATAACCAATCGATATTGAGTATCCACTTA    | 1799<br>1800 |
| Indigo-Rose<br>Heinz1706 | CTTCTTTGGCCTACTTATACCTCTCCTCGTACATACCATAACTAACTTCTCGCACCTTCTACTGGGGCATCTGC<br>CTTCTTTGGCCTACTTATACCTCTCCTCGTACATACCATAACTAACTTCTCGCACCTTCTACTGGGGCATCTGC    | 1874<br>1875 |
| Indigo-Rose<br>Heinz1706 | GCATATTCTTTCACATGTTCAAATCATTTAATCTTAATCTATCATCTTGTCACCACGGACTACGGAGCCAC<br>GCATATTCTTTCACATGTTCAAATCATTTAATCTTAATCTATCATCTTGTCACCACGGACTACGGAGCCAC          | 1949<br>1950 |
| Indigo-Rose<br>Heinz1706 | TCTCATCTTATTTAGAATATTCTCAACATCCTCATTAACCTCGACATGCATCTTCTGAACATGGTAGCCATCACT<br>TCTCATCTTATTTAGAATATTCTCAACATCCTCATTAACCTCGACATGCATCTTCTGAACATGAGTAGCCATCACT | 2024<br>2025 |
| Indigo-Rose<br>Heinz1706 | CCGCTTATACAACAAAGTTTGCTAACTACCAACTTATAGAACTTACCTGAAATTTCAATGGTACATTTTGG<br>CCGCTTATACAACAAAGTTTGCTAACTACCAACTTATAGAACTTACCTGAAATTTCAATGGTACATTTTGG          | 2099<br>2100 |
| Indigo-Rose<br>Heinz1706 | TCATACAAGACTCCGGATGCAACCTTTCACTTCATTCACATGCACCAATACGATATATAATATCATCGTCAATAT<br>TCATACAAGACTCCGGATGCAACCTTTCACTTCATTCACATGCACCAATACGATATATAATATCATCGTCAATAT  | 2174<br>2175 |
| Indigo-Rose<br>Heinz1706 | CTCCATTTCTTCTATTATAAATCAAGATACTGAAACTATGATAAAAAAAATACTTCAAATCGTATTACC<br>CTCCATTTCTTCTATTATAAATCAAGATACTGAAACTATGATAAAAAAAATACTTCAAATCGTATTACC              | 2249<br>2249 |
| Indigo-Rose<br>Heinz1706 | AAAATTTACAGTTTCACTCTCGAAAAATAAAACATGACACGAAAGAAGAATTTGTATCGTACAATTCATAATTA<br>AAAATTTACAGTTTCACTCTCGAAAAATAAAACATGACACGAAAGAAGAATTTGTATCGTACAATTCATAATTA    | 2324<br>2324 |
| Indigo-Rose<br>Heinz1706 | AAATAAAAAATAGTTCTAATATTGAGGAGTAGTAACACTTCGTTGTTGGTGAAAATGTTAGGCAAATAATTTCCA<br>AAATAAAAAATAGTTCTAATATTGAGGAGTAGTAACACTTCGTTGTTGGTGAAAATGTTAGGCAAATAATTTCCA  | 2399<br>2399 |
| Indigo-Rose<br>Heinz1706 | ACTAACCAGTCGATATTTGAGTATCCACCTACCTCAATTTATTGGACCACCACACTTCACTGTCATCTACCAT<br>ACTAACCAGTCGATATTTGAGTATCCACCTACCTCAATTTATTGGACCACCACACTTCACTGTCATCTACCAT      | 2474<br>2474 |
| Indigo-Rose<br>Heinz1706 | TCTTCATATGTTTGCTTTTTTTTTATTTTATTCACTCAAATCAGAACCACCCCTTCTTTTAGAATCCTTTTTTT<br>TCTTCATATGTTTGCTTTTTTTTTATTTTATTCACTCAAATCAGAACCACCCCTTCTTTTAGAATCCTTTTTTT    | 2549<br>2549 |
| Indigo-Rose<br>Heinz1706 | TTAATCATATAGTAGTAATAAAATTTTCTATGTATATATATAGACCACATTCAAATCTTTGTTCTCCACATATA<br>TTAATCATATAGTAGTAATAAAATTTTCTATGTATATATATAGACCACATTCAAATCTTTGTTCTCCACATATA    | 2624<br>2624 |

**Start code**

|                          |                                                                                                                                                            |              |
|--------------------------|------------------------------------------------------------------------------------------------------------------------------------------------------------|--------------|
| Indigo-Rose<br>Heinz1706 | CTCTTCCTTAATTAGTACTCCAATTCATTAATTAAGTTTTATTTCTTGTGATGGCAGATTGGAATAGATCAAG<br>CTCTTCCTTAATTAGTACTCCAATTCATTAATTAAGTTTTATTTCTTGTGATGGCAGATTGGAATAGATCAAG     | 2699<br>2699 |
| Indigo-Rose<br>Heinz1706 | CACATCAGATAATGCCTCAGTGGTCTCACCTGGTAATTAACAATCTTTTTATTTTATCGCAAGAGCTTTTAA<br>CACATCAGATAATGCCTCAGTGGTCTCACCTGGTAATTAACAATCTTTTTATTTTATCGCAAGAGCTTTTAA       | 2774<br>2773 |
| Indigo-Rose<br>Heinz1706 | TTATTCTTTTCGTTCACTTTTATTGATCTATTTTGACATCTCATGCTCCTTACCAAAATTTTCTTTTGATATAA<br>TTATTCTTTTCGTTCACTTTTATTGATCTATTTTGACATCTCATGCTCCTTACCAAAATTTTCTTTTGATATAA   | 2849<br>2848 |
| Indigo-Rose<br>Heinz1706 | GGGCTCTACAGTACATATAAATTGATATTTGATATTATGTTTGAAGAAGATTGAGAAATAAATAACTAATGA<br>GGGCTCTACAGTACATATAAATTGATATTTGATATTATGTTTGAAGAAGATTGAGAAATAAATAACTAATGA       | 2924<br>2923 |
| Indigo-Rose<br>Heinz1706 | GCTAAGGGTAAACATGAAATAAAATATTTGCTTTTTTTCATGTTAAAAAGTAAACGAGTAAAAATGAACGGATAC<br>GCTAAGGGTAAACATGAAATAAAATATTTGCTTTTTTTCATGTTAAAAAGTAAACGAGTAAAAATGAACGGATAC | 2999<br>2998 |

|                       |                                                                              |      |
|-----------------------|------------------------------------------------------------------------------|------|
| Indigo-Rose           | TTTTATATTGCTTATAAATATATTCCTTAAAGGAATTTGGAGAACATTATGATATGATTATCTGCGTCTAACCA   | 3074 |
| Heinz1706             | TTTTATATTGCTTATAAATATATTCCTTAAAGGAATTTGGAGAACATTATGATATGATTATCTGCGTCTAACCA   | 3073 |
| Indigo-Rose           | TATACTCTAATAATGCCATAAGTAAACAAATATTTATCCTTTGGCTACTTCCAAAATACATGTTCAATTTATGAA  | 3149 |
| Heinz1706             | TATACTCTAATAATGCCATAAGTAAACAAATATTTATCCTTTGGCTACTTCCAAAATACATGTTCAATTTATGAA  | 3148 |
| Indigo-Rose           | ATCATTTTTTTAATAATAAGTTAGTTAGTCGGAATTTAGACTTTAAAAATTTATATATTTTTTACATCAAGTTA   | 3224 |
| Heinz1706             | ATCATTTTTTTAATAATAAGTTAGTTAGTCGGAATTTAGAAATTTAAAAATTTATGATTTTTTACATCAAGTTA   | 3223 |
| Indigo-Rose           | ATATATTAATACTACTTATAAGTTCACAATTAATATTCAATTTTGTAATAATTTTCTTAATATATTTATAAGTC   | 3299 |
| Heinz1706             | ATATATTAACACTACTTATAAGTTCACAATTAATATTCAATTTTGTAATAATTTTCTTAATATATTTATAAGTC   | 3298 |
| <b>4-bp insertion</b> |                                                                              |      |
| Indigo-Rose           | TAAATAAAAGTTATTGAGTTCACGTGAATTCATTATAGATAGATTCGACCCGAGTGGTTCATTAGAGACTACCA   | 3374 |
| Heinz1706             | TAAATAAAAGTTATTGAGTTCACGTGAATTCATTATAGAT----TTCGACCCGAGTGGTTCATTAGAGACTACCA  | 3369 |
| Indigo-Rose           | ACGAAGAAACCTCTAAACTTGAATTTTCAGAAGATGAAGAAATGCTCATTGCTAAAATGTTTCAGCTTGTTAGAG  | 3449 |
| Heinz1706             | ACGAAGAAACCTCTAAACTTGAATTTTCAGAAGATGAAGAAATGCTCATTGCTAAAATGTTTCAGCTTGTTAGAG  | 3444 |
| Indigo-Rose           | AGAGGTACGTTAATATTTTTTTAAAAAAATCTTGAATTTTGTGTATTAATTATTTAAGGTTAATATAAAAAAT    | 3524 |
| Heinz1706             | AGAGGTACGTTAATATTTTTTTAAAAAAATCTTGAATTTTGTGTATTAATTATTTAAGGTTAATATAAAAAAT    | 3519 |
| Indigo-Rose           | GTCATGGTGAATTTTAATTAGGTGGTCATTAATTGCTGGAAGAATCCAGGAAGAAATGCTGATGAGATTGAAA    | 3599 |
| Heinz1706             | GTCATGGTGAATTTTAATTAGGTGGTCATTAATTGCTGGAAGAATCCAGGAAGAAATGCTGATGAGATTGAAA    | 3594 |
| Indigo-Rose           | AATATTGGAATCAAAATACTCCAAAAGCCAGTAAATTTCTTCAAATTACTTTTTCCCTCAGATGAATATTTTTA   | 3674 |
| Heinz1706             | AATATTGGAATCAAAATACTCCAAAAGCCAGTAAATTTCTTCAAATTACTTTTTCCCTCAGATGAATATTTTTA   | 3669 |
| Indigo-Rose           | TCTATTTTTATTTATCTAATATTAATTCGATGACTTCATAATATTTTTAAAAAATTCATAGTAAATAACAAAGA   | 3749 |
| Heinz1706             | TCTATTTTTACTTTATCTAATATTAATTCGATGACTTCATAATATTTTTAAAAAATTCATAGTAAATAACAAAGA  | 3744 |
| Indigo-Rose           | TAAATAATAAGTGATAAGCTTATCTCTAGATTTCTAAGTTGGATAAGTAAGAATGTTGTAGAACTAGAGAGGAA   | 3824 |
| Heinz1706             | TAAATAATAAGTGATAAGCTTATCTCTAGATTTCTAAGTTGGATAAGTAAGAATGTTGTAGAACTAGATAGGAA   | 3819 |
| Indigo-Rose           | GTAGTCTTTTCGTTCACTTCTATTTATCTAACTTATCTACTGTAGATTATAATTTTTTTAAAAAATTACTTTTAAA | 3899 |
| Heinz1706             | GTAGTCTTTTCGTTCACTTCTATTTATCTAACTTATCTACTGTAGATTATAATTTTTTTAAAAAATTACTTTTAAA | 3894 |
| Indigo-Rose           | ACTTATTTCTCAAATATTTTTCAAGACTTAGAGATTAATAATATAATATATATTTAACATAGGGTAGAGGA      | 3974 |
| Heinz1706             | ACTTATTTCTCAAATATTTTTCAAGACTTAGAGATTAATAATCAATATAATATATTTAACATAGGGTAGAGGA    | 3966 |
| Indigo-Rose           | CAAAAATCACATACTTTAAGGTAAAATTAATAATTTGTTCCCTTGAAATTTATAATTCAAAATATCTCTCAAAC   | 4049 |
| Heinz1706             | CAAAAATCACATACTTTAAGGTAAAATTAATAATTTGTTCCCTTGAAATTTATAATTCAAAATATCTCTCAAAC   | 4041 |
| Indigo-Rose           | GATACAATAATACAAACGTTGATACATTAATCTAATTGCGCGGATACATTATTCGTTAGGTAAGATAACAATAAAT | 4124 |
| Heinz1706             | GATACAATAATACAA-----GCGCGAATACATTATTCGTTAGGTAAGATAACAATAAAT                  | 4094 |
| Indigo-Rose           | TTTATATATGATACACTGATCTAATGTATATTTTATACATGATACACTAATCTGATGCGGGAATACATTAATAT   | 4199 |
| Heinz1706             | TTTATATA-----CACTGATCTAATGTATATTTTATACATGATACACTAATCTGATGCGGAAGATACATTAATAT  | 4164 |
| Indigo-Rose           | GAAGTGTGAAAATGAAAAATTTGAAAATTTATAAACTAATAGGAAATAATTATAACAAAAATTTAAAAATGAAA   | 4274 |
| Heinz1706             | GAAGCGTGAAAATG-----                                                          | 4178 |
| Indigo-Rose           | TTTTTGTCATATATCCTTTAATATAAGTATTGTAATAAAATACTCATGTGAAACATTATTTTTTAAAAAGAATATA | 4349 |
| Heinz1706             | -----                                                                        | -    |
| Indigo-Rose           | TAAAGTCTAATTAACAAATAAGAATGAACAAAGAAAGTATATCATCACTTCAACCTAGCTGAATGCAATGACAG   | 4424 |
| Heinz1706             | -----                                                                        | -    |
| Indigo-Rose           | TACAAGCTAAAATATGTTTTTGAACAAGATTTCAATTTTAGGAATTTGAATTTTTCAAAAAATTTATATAGTATCG | 4499 |
| Heinz1706             | -----                                                                        | -    |

|                          |                                                                                                                                                                |              |
|--------------------------|----------------------------------------------------------------------------------------------------------------------------------------------------------------|--------------|
| Indigo-Rose<br>Heinz1706 | TAGATATTAATATATATTATTTATAAAATATTTTCAAATAAAAAATATAAAGTTTACCTAAGTCTAAGATGATTAA<br>-----                                                                          | 4574<br>-    |
| Indigo-Rose<br>Heinz1706 | ATTCTGTTAAACTCGTAATCGTAAACAAACTTGAAACTCCGTCCCTTGTGGTTATGTACTTTCAGAAGTTCGTG<br>-----TTAAATTCGTAATCGTAAACAAACTTGAAACTCCGTCCCTTGTGGTTATGTACTTTCAGAAGTTCGTG        | 4649<br>4247 |
| Indigo-Rose<br>Heinz1706 | TATCTTGCATGAAATTAATATTTTTATATTTGAACAGTATACACAGTGAATATCATGTCATTTCAGGATCTTC<br>TATCTTGCATGAAATTAATATTTTTATATTTGAACAGTATACACAGTGAATATCATGTCATTTCAGGATCTTC         | 4724<br>4322 |
| Indigo-Rose<br>Heinz1706 | ACATTTACTTTATTTTTACTTTTACTACTTTTAATTTAACGATCCTTAGAAAAATGATATAATTATTTTATGAT<br>ACATTTACTTTATTTTTACTTTTACTACTTTTAATTTAACGATCCTTAGAAAAATGATATAATTATTTTATGAT       | 4799<br>4397 |
| Indigo-Rose<br>Heinz1706 | AATATTTGTATTAATTGATGTTAATATATCTTTTGAAAAATAATTTAGAAAAAAGTAATTAATGTTAAGAAA<br>AATATTTGTATTAATTGATGTTAATATATCTTTTGAAAAATAATTTAGAAAAAAGTAATTAATGTTAAGAAA           | 4874<br>4472 |
| Indigo-Rose<br>Heinz1706 | AAAAACAATATTTTTATACGTTAAAAGTGACAAGTAAATGCAAATAAAAAGTATTATTCAGTATGATCAATAA<br>AAAAACAATATTTTTATACGTTAAAAGTGACAAGTAAATGCAAATAAAAAGTATTATTCAGTATGATCAATAA         | 4949<br>4547 |
| Indigo-Rose<br>Heinz1706 | GCGAGTAAAAATATTCAGTAAGAAGATTCAACATATATTATATATATGAACATAAAAAAAAATTTCAATCCTTTT<br>GCGAGTAAAAATATTCAGTAAGAAGATTCAACATATATTATATATATGAACATAAAAAAAAATTTCAATCCTTTT     | 5024<br>4622 |
| Indigo-Rose<br>Heinz1706 | TGATTCTTTGGTGACTTGAACCTTACATCCTTAGTATAATGATTGTTTACCATTTCGAGCAACTTCCATGAAAATCT<br>TGATTCTTTGGTGACTTGAACCTTACATCCTTAGTATAATGATTGTTTACCATTTCGAGCAACTTCCATGAAAATCT | 5099<br>4697 |
| Indigo-Rose<br>Heinz1706 | TTTCATTATCTGTAACGTTTTTATTAGGAGTTTTTTTAAAAAAAATAATAAAAAACAAAAATTTGTACTCTTC<br>TTTCATTATCTGTAACGTTTTTATTAGGAGTTTTTTTAAAAAAAATAATAAAAAACAAAAATTTGTACTCTTC         | 5174<br>4772 |
| Indigo-Rose<br>Heinz1706 | ATTTAGGGAGGAAATACAGGCCCAATCTCAAGATGAAGCTCATGGCATTAGATTGATAGAGAAAACGGGCCTTC<br>ATTTAGGGAGGAAATACAGGCCCAATCTCAAGATGAAGCTCATGGCATTAGATTGATAGAGAAAACGGGCCTTC       | 5249<br>4847 |
| Indigo-Rose<br>Heinz1706 | AACGGCGCACCTCAGCAGTGTGTTTTCCAGAAAAAAGCCCATATCTGTCTGTCAACCTTCAGATATGGGCC<br>AACGGCGCACCTCAGCAGTGTGTTTTCCAGAAAAAAGCCCATATCTGTCTGTCAACCTTCAGATATGGGCC             | 5324<br>4922 |
| Indigo-Rose<br>Heinz1706 | TCAACTATTGGGCCCAACAACGAATGGGCTCAACAGCTATTGGGCCCTAAAACAACTGGGCCCAATAACATCAC<br>TCAACTATTGGGCCCAACAACGAATGGGCTCAACAGCTATTGGGCCCTAAAACAACTGGGCCCAATAACATCAC       | 5399<br>4997 |
| Indigo-Rose<br>Heinz1706 | TGTAGACCAAAAGTTAGTTAACCCAGCCCAAGACCAAATAAACCAATAACTTATGCCAGCCCAGCCCAAGATTG<br>TGTAGACCAAAAGTTAGTTAACCCAGCCCAAGACCAAATAAACCAATAACTTATGCCAGCCCAGCCCAAGATTG       | 5474<br>5072 |
| Indigo-Rose<br>Heinz1706 | GTCAAACATGACACTAGACAAACCTACAATATATTTCTATTACATATTTTCGCAAAATACCTACTACTCAATTA<br>GTCAAACATGACACTAGACAAACCTACAATATATTTCTATTACATATTTTCGCAAAATACCTACTACTCAATTA       | 5549<br>5147 |
| Indigo-Rose<br>Heinz1706 | TGCTATGTATAGCTATAGTTGCATATTTACTAGTTGTAGTTACAGTTAAGTTATCTCGTTTGTATAATTTACA<br>TGCTATGTATAGCTATAGTTGCATATTTACTAGTTGTAGTTACAGTTAAGTTATCTCGTTTGTATAATTTCCA         | 5624<br>5222 |
| Indigo-Rose<br>Heinz1706 | TGTATGTTTAAATAAGTGAGTTATATTTGTATAAACTCAAATAATGAATTTATACAAACACAAACATTTAACT<br>TATATGTTTAAATAAGTGAGTTATATTTGTATAAACTCAAATAATGAATTTATACAAACACAAACATTTAACT         | 5699<br>5297 |
| Indigo-Rose<br>Heinz1706 | TAAATAGTTGTACAGATATATTATACAAAAGTTATACAAATTATATATACAACTTTCCGAATTATACACACTCG<br>TAAATAGTTGTACAGATATATTATACAAAAGTTATACAAATTATATATACAACTTTCCGAATTATACACACTCG       | 5774<br>5372 |
| Indigo-Rose<br>Heinz1706 | ATTTGATTTTCTTGGAAAGTGTGACGACACAATGTTTTATAGACCATGATCATGATCATAATATTTGTGTAT<br>ATTTGATTTTCTTGGAAAGTGTGACGACACAATGTTTTATAGACCATGATCATGATCATAATATTTGTGTAT           | 5849<br>5447 |
| Indigo-Rose<br>Heinz1706 | TTGATTAACCTTATAATGTTATTAATTAATTTTACGTACTTTTTAATAAGTTACAGATATCTCATATCCTTTC<br>TTGATTAACCTTATAATGTTATTAATTAATTTTACGTACTTTTTAATAAGTTACAGATATCTCATATCCTTTC         | 5924<br>5522 |
| Indigo-Rose<br>Heinz1706 | TAATAAAATATCTTATATCCTTTCTAATAACCTCTCCTCGAACAATTGCTTTAAGTTTCAAATAATGACTATTT<br>TAATAAAATATCTTATATCCTTTCTAATAACCTCTCCTCGAACAATTGCTTTAAGTTTCAAATAATGACTATTT       | 5999<br>5597 |
| Indigo-Rose<br>Heinz1706 | CTATTTCAATTTTTGATAGTTCCCTATTAAGGGAAAATTACGTGGAATGACAAACATTCTTAAGTAATTAGTCAA<br>CTATTTCAATTTTTGATAATTCCTATTAAGGGAAAATTACGTGGAATGACAAACATTCTTAAGTAATTAGTCAA      | 6074<br>5671 |

|                          |                                                                                                                                                            |              |
|--------------------------|------------------------------------------------------------------------------------------------------------------------------------------------------------|--------------|
| Indigo-Rose<br>Heinz1706 | TAAGGGTATATTTAATTTATTTACTCAATAACTATAGTTTCATTTTTTTGCCATAATTAATGGGACCCACCATC<br>TAAGGGTATATTTAATTTATTTGACTCAATAACTATAGTTTCATTTTTTTGCCATAATTAATGGGACCCACCATC  | 6149<br>5746 |
| Indigo-Rose<br>Heinz1706 | TCTTTGTATATCCAACCATGAAACAAAAAGTTATCTTTTTATATATAATTTTATCAAATCAATTTTATCTCTCCT<br>TCTTTGTATATCCAACCATGAAACAAAAAGTTATCTTTTTATATATAATTTTATCAAATCAATTTTATCTCTCCT | 6224<br>5821 |
| Indigo-Rose<br>Heinz1706 | ACACTCATCTATATCTTTCTTCTAAAACTACTCTCCACTCCTATTTTGAATTTTGAATTTGGAAAATTTAC<br>ACACTCATCTATATCTTTCTTCTAAAACTACTCTCCACTCCTATTTTGAATTTTGAATTTGGAAAATTTAC         | 6299<br>5896 |
| Indigo-Rose<br>Heinz1706 | CATATCCCTGTGTCTTACTTTCATTAATCCAATTTTTTTTAAAAAATTTCTTCATCAACACAATTATATATGT<br>CATATCCCTGTGTCTTACTTTCATTAATCCAATTTTTTTTAAAAAATTTCTTCATCAACACAATTATATATGT     | 6374<br>5971 |
| Indigo-Rose<br>Heinz1706 | ATTATTTTTCTTAGTTTTTTTCATATTTTTTTAAAAAATTTCTTCTTTCTTTTCAGTTAAAGTTCTTCAA<br>ATTATTTTTCTTAGTTTTTTTCATATTTTTTTAAAAAATTTCTTCTTTCTTTTCAGTTAAAGTTCTTCAA           | 6449<br>6046 |
| Indigo-Rose<br>Heinz1706 | ATGAGAATAAAGAATTCATCTCCATATATGAGTATTAGCATAGGTATGTCATTACATGCAATATTGTTGATAAT<br>ATGAGAATAAAGAATTCATCTCCATATATGAGTATTAGCATAGGTATGTCATTACATGCAATATTGTTGATAAT   | 6524<br>6121 |
| Indigo-Rose<br>Heinz1706 | CCACCTTCGTTTTCAATTGAGTATTTCAGGATTTTGGGGTCAATGTAGGGTATATGACAAAACCTAAAAAAGTT<br>CCACCTTCGTTTTCAATTGAGTATTTCAGGATTTTGGGGTCAATGTAGGGTATATGACAAAACCTAAAAAAGTT   | 6599<br>6196 |
| Indigo-Rose<br>Heinz1706 | CAAGTTGAACAATATCTTGAATAGAGATCAAGAAAAAATGACCCAATTACAATTCAGAAAGTCATCAACAACG<br>CAAGTTGAACAATATCTTGAATAGAGATCAAGAAAAAATGACCCAATTACAATTCAGAAAGTCATCAACAACG     | 6674<br>6271 |
| Indigo-Rose<br>Heinz1706 | CGAAATCTAGCGGCATTATAGTTGAAGTTGAAGCAAGAGAAAAGTCAAACATAAATTCAGACGAGATCGGATCT<br>CGAAATCTAGCGGCATTATAGTTGAAGTTGAAGCAAGAGAAAAGTCAAACATAAATTCAGACGAGATCGGATCT   | 6749<br>6346 |
| Indigo-Rose<br>Heinz1706 | ATCTCATCAAAACTGGACAGAAGTAGACAAATCTGAAGAACATCAGGTTGTGTAATTTATATACAAATTACTAAA<br>ATCTCATCAAAACTGGACAGAAGTAGACAAATCTGAAGAACATCAGGTTGTGTAATTTATATACAAATTACTAAA | 6824<br>6421 |
| Indigo-Rose<br>Heinz1706 | GTTATGTATATAGTGGGTTGTGATTAAGGTAATATATACAAAGTATTATGAGATAATTGTTATTTGTATACAAA<br>GTTATGTATATAGTGGGTTGTGATTAAGGTAATATATACAAAGTATTATGAGATAATTGTTATTTGTATACAAA   | 6899<br>6496 |
| Indigo-Rose<br>Heinz1706 | TATTTGTATAAAAGAAATTTGTTAATCATTGTATAATACATATATAAAATTAAGTACATTATACAACCTTTGTCG<br>TATTTGTATAAAAGAAATTTGTTAATCATTGTATAATACATATATAAAATTAAGTACATTATACAACCTTTGTCG | 6974<br>6571 |
| Indigo-Rose<br>Heinz1706 | ATATATAAAAAAATTATGAACATGATAAAATATTGTATATATAAACATTACACACTAAATACACAAACATATTT<br>ATATATAAAAAAATTATGAACATGATAAAATATTGTATATATAAACATTACACACTAAATACACAAACATATTT   | 7049<br>6646 |
| Indigo-Rose<br>Heinz1706 | CAAGTTTACCATATATACAATTGACAAATGAATATTATACAATCATTGATCATTAAATTTTTTTAAAAACAT<br>CAAGTTTACCATATATACAATTGACAAATGAATATTATACAATCATTGATCATTAAATTTTTTTAAAAACAT       | 7124<br>6721 |
| Indigo-Rose<br>Heinz1706 | GAAATTACATATGTACATATACAAATATGATTCATATACCAAATTATGTATATTATACAAATCCATACATATAT<br>GAAATTACATATGTACATATACAAATATGATTCATATACCAAATTATGTATATTATACAAATCCATACATATAT   | 7199<br>6796 |
| Indigo-Rose<br>Heinz1706 | ACTATAAAAAAATGAACATAATAAAATATTGTATACAAATAAACTACAGAAAATAATTAAGAACAATAACAACAC<br>ACTATAAAAAAATGAACATAATAAAATATTGTATACAAATAAACTACAGAAAATAATTAAGAACAATAACAACAC | 7274<br>6871 |
| Indigo-Rose<br>Heinz1706 | ACTTTTATTTTAAAAAACAACATAATTGTCATATATACAATTTTCATATTTATGATGAATAATACATAATAAAT<br>ACTTTTATTTTAAAAAACAACATAATTGTCATATATACAATTTTCATATTTATGATGAATAATACATAATAAAT   | 7349<br>6946 |
| Indigo-Rose<br>Heinz1706 | TACACATGAAATTGTATAAAAAATTATTACAATTTTCAAATATATACAATATAATCAATGTGTGTGTGTATAT<br>TACACATGAAATTGTATAAAAAATTATTACAATTTTCAAATATATACAATATAATCAATGTGTGTGTGTATAT     | 7424<br>7021 |
| Indigo-Rose<br>Heinz1706 | ATATATATATAAATAAAATCATTAAACGTCTAAGTGTTCATACAACCTATTTTTAAATAAAATTTGAGAAAAATT<br>ATATATATATAAATAAAATCATTAAACGTCTAAGTGTTCATACAACCTATTTTTAAATAAAATTTGAGAAAAATT | 7499<br>7096 |
| Indigo-Rose<br>Heinz1706 | TGATTTTGAATGGTTAGCTTAAATAATGGGATTGTGAAATGTTGTACCTTATTTAGCGATATTGTTACCATT<br>TGATTTTGAATGGTTAGCTTAAATAATGGGATTGTGAAATGTTGTACCTTATTTAGCGATATTGTTACCATT       | 7574<br>7171 |
| Indigo-Rose<br>Heinz1706 | CAATGAATAAGTAAAAATTAATAAATTAATAAATAAAAAAATTTTTTTTACAATTTAAAGATACATAACAAA<br>CAATGAATAAGTAAAAATTAATAAATTAATAAATAAAAAAATTTTTTTTACAATTTAAAGATACATAACAAA       | 7649<br>7246 |

|             |                                                                              |      |
|-------------|------------------------------------------------------------------------------|------|
| Indigo-Rose | CTAAACTATACCTATAAAATGTAATTATGTAAACTACACCTATATAATATTATTTAATAAAATTATGTTGCTATT  | 7724 |
| Heinz1706   | CTAAACTATACCCATAAAATGTAATTATGTAAAACCACACCTATATAATATTATTTAATAAAATTATGTTGCCATT | 7321 |
| Indigo-Rose | TATGAAATTTTCCTTATTAATTAATTACACGATTTACAAGCAGTGAGGAACAAAAATTGAGGTGGCAAAACTTAT  | 7799 |
| Heinz1706   | TATGAAATTTTCCTTATTAATTAATTACACGATTTACAAGCAGTGAGGAACAAAAATTGAGGTGGCAAAACTTAT  | 7396 |
| Indigo-Rose | CCTGATGATCGGCATGTATAGCTTCATTTTGATGTCACACTAATACTATAGTCTATATATAGTAGCAATACTTG   | 7874 |
| Heinz1706   | CCTGATGATCGGCATGTATAGCTTCATTTTGATGTCACACTAATACTATAGTCTATATATAGTAGCAATACTTG   | 7471 |
| Indigo-Rose | ATAGAATCTTCAAATAATCAACCCAACCTAATAAAGTACTAAACAATATTTTCGTGTGGATAACTATGAATAGAAT | 7949 |
| Heinz1706   | ATAGAATCTTCAAATAATCAACCCAACCTAATAAAGTACTAAACAATATTTTCGTGTGGATAACTATGAATAGAAT | 7546 |
| Indigo-Rose | CGGAT                                                                        | 7954 |
| Heinz1706   | CGGAT                                                                        | 7551 |

**Fig. S2** Sequence polymorphism of the genomic sequence of *SIMYBATV*. Sequences were aligned by using Clustal X ver. 2 (Larkin *et al.*, 2007) with default settings, and conserved nucleotides were shaded by GeneDoc (2.6) (Nicholas *et al.*, 1997).



R2

|               |                                                                          |    |
|---------------|--------------------------------------------------------------------------|----|
| AtMYBL2       | -----MN-----KTR-----LRALSPSPGMQHR-----KRCRLRGRNY                         | 28 |
| MdMYB6        | -MAVSRKDMD-----RIKGPWSPEEDDSLQRLVQKHGPRNWSLISKSI-PGRSGKSCRLRWQNG         | 57 |
| PtrMYB182     | -MRKPCCDKR-----GNNKGAWSTBEDQKLDYIQTHGEGCWRSIPEAAGLHRCGKSCRLRWINY         | 59 |
| GhMYB6        | -MRKPCCDKQ-----GTNKGAWSKQEDQKLDYIRIHGEGCWRSLPKAAGLHRCGKSCRLRWINY         | 59 |
| PpMYB19       | -MRKPCCDKE-----GTNKGAWSKQEDQKLDYIKAHGEGCWRSLPKAAGLHRCGKSCRLRWINY         | 59 |
| VvMYBC2-L3    | -MRKPCCDKK-----DTTKGAWSKQEDQRLIDYIKTHGEGCWRSLPKAAGLHRCGKSCRLRWINY        | 59 |
| VvMYB4-like   | -MRKPCCDKK-----DTTKGAWSKQEDQRLIDYIKTHGEGCWRSLPKAAGLHRCGKSCRLRWINY        | 59 |
| VvMYBC2-L1    | -MRKPCCDKQ-----DTNKGAWSKQEDQKLDYIRKNGEGCWRTLPQAAGLLRCGKSCRLRWINY         | 59 |
| PpMYB18       | -MRKPCCDKQ-----DTNRGAWSKQEDLKLIDYIRKHGEGCWRTLPQAAGLLRCGKSCRLRWINY        | 59 |
| GmMYB100      | -MRKPSCDIK-----DLNKGAWSKQEDQKLDYIKKHGEVCWRTLPQAAGLHRCGKSCRLRWINY         | 59 |
| TrMYB133      | -MRKPSCDIKLE-----KNINKGVWSKQEDQKLDYINKHGEVCWSTLPQAAGLLRCGKSCRLRWINY      | 62 |
| PhMYB27       | -MRKACDNKEE-----MHRGAWSKQEDQKLDYITKHGAGCWRLPKADGLLRCGKSCRLRWINY          | 60 |
| SlMYB76       | -MRKPCCDNKEE-----MHKGAWSKQEDQKLDYITKHGEGCWRLPKAAGLLRCGKSCRLRWINY         | 60 |
| VvMYBC2-L2    | -MRKPAGYGEKKSTKKRVGCEKFTNKGAWSKQEDQKLDYIQKHGEGCWSSLPQSAAGLLRCGKSCRLRWINY | 72 |
| MtMYB2        | -MRKPCCDKE-----NINKGAWSKQEDQKLDYIQVHGEGCWGSIPKAAGLHRCGKSCRLRWINY         | 59 |
| TrMYB134      | -MRTPCDKE-----NINKGAWSKQEDKLLIDYIQVHGEGCWGSIPKAAGLHRCGKSCRLRWINY         | 59 |
| FaMYB1        | -MRKPCCDKE-----ETTNGAWSKQEDQKLDYIQKHGEGCWNSLPKAAGLHRCGKSCRLRWINY         | 59 |
| ZmMYB31       | MGRSPCEKA-----HTNKGAWTKEEDERLVAHTRAHGEGCWRSLPKAAGLLRCGKSCRLRWINY         | 60 |
| ZmMYB42       | MGRSPCEKA-----HTNRGAWTKEEDERLVAYVRAHGEGCWRSLPRAAGLLRCGKSCRLRWINY         | 60 |
| VvMYB4a       | MGRSPCEKA-----HTNKGAWTKEEDDRLIAYIRAHGEGCWRSLPKAAGLLRCGKSCRLRWINY         | 60 |
| PdMYB221      | MGRSPCEKA-----HTNKGAWTKEEDDRLIAYIRTHGEGCWRSLPKAAGLLRCGKSCRLRWINY         | 60 |
| PpMYB17       | MGRSPCEKA-----HTNKGAWTKEEDDRLIAYIRAHGEGCWRSLPKAAGLLRCGKSCRLRWINY         | 60 |
| AmMYB308      | MGRSPCEKA-----HTNKGAWTKEEDDRLVAYIRAHGEGCWRSLPKAAGLLRCGKSCRLRWINY         | 60 |
| CmMYB1        | MGRSPCEKA-----HTNKGAWTKEEDDRLIAYIRTHGEGCWRSLPKAAGLLRCGKSCRLRWINY         | 60 |
| PhMYB4        | MGRSPCEKA-----HTNKGAWTKEEDERLIAYIKAHGEGCWRSLPKAAGLLRCGKSCRLRWINY         | 60 |
| SlMYB32       | MGRSPCEKA-----HTNKGAWTKEEDERLISYIRAHGEGCWRSLPKAAGLLRCGKSCRLRWINY         | 60 |
| SlMYB7        | MGRSPCEKA-----HTNKGAWTKEEDERLISYIKTHGEGCWRSLPKAAGLLRCGKSCRLRWINY         | 60 |
| EgMYB1        | MGRSPCEKA-----HTNKGAWTKEEDDKLIAYIRAHGEGCWRSLPKAAGLLRCGKSCRLRWINY         | 60 |
| AtMYB32       | MGRSPCEKD-----HTNKGAWTKEEDDKLISYIKAHGEGCWRSLPKASAGLQRCGKSCRLRWINY        | 60 |
| AtMYB7        | MGRSPCEKE-----HMNKGAWTKEEDERLVSYIKSHGEGCWRSLPRAAGLLRCGKSCRLRWINY         | 60 |
| AtMYB4        | MGRSPCEKA-----HTNKGAWTKEEDERLVAYIKAHGEGCWRSLPKAAGLLRCGKSCRLRWINY         | 60 |
| LlMYB1        | MGRSPCEKA-----HTNKGAWTKEEDDRLVAYIRAHGEGCWRSLPKAAGLLRCGKSCRLRWINY         | 60 |
| AtMYB3        | MGRSPCEKA-----HMNKGAWTKEEDQLVDYIRKHGEGCWRSLPRAAGLQRCGKSCRLRWINY          | 60 |
| PpMYB20       | MGRSPCEKA-----HTNKGAWTKEEDQRLIDYIRVHGEGCWRSLPKAAGLLRCGKSCRLRWINY         | 60 |
| SlMYB3        | MGRSPCEKA-----HTNKGAWTKEEDQRLINIRAHGEGCWRSLPKAAGLRCGKSCRLRWINY           | 60 |
| GbMYBF2       | MGRQPCDKAG-----LKKGPWTAEDDRKLVNFITTHGEGCWREVPKLAGLLRCGKSCRLRWINY         | 60 |
| MdMYB10       | -MEGYNENLS-----VRKGAWTREEDNLRQCVIEHGEKWNQVSYKAGLNRCRKSQRWLN              | 58 |
| AtETC2        | -----MDNTNRLRLRRGPSLRQTKFTRSRDYDSEEVSSIWE--                              | 36 |
| AtTRY         | -----MDNDRRRRRK-----QHKIA--LHDSEEVSSIWE--                                | 29 |
| VvTRY         | -----MD-----RRRRK-----LPKIA-APSQSEEVSSIWE--                              | 26 |
| SlTRY         | -----MDQNLHHRHKL-----MHRCC--SHEEVNSMEWE--                                | 29 |
| AtETC3        | -----MDNHRRTKQPK-----TN-SIVTSSSEGTEVSSIWE--                              | 31 |
| AtETC1        | -----MNTQRKSKHLK-----TNPTIVASSSE--EVSSIWE--                              | 30 |
| AtCPC         | -----MFRSDKAEKMDKRRR-----RQSKAKASCSE--EVSSIWE--                          | 34 |
| EcROI1        | -----MAS-SENSSSDD-YFSTSQE-----VNNKETKV--                                 | 26 |
| ElROI1        | -----MAS-SENSSSDD-YFSTSQE-----VNNKESKV--                                 | 26 |
| PhMYBx        | -----MADKGQSSSSVN-TPADSQDGVAPRMLVSGKTSKVA--                              | 35 |
| SlMYBATV-X1   | -----MADWNRSSTSDN-ASVVPDSTRVVA-LETTNEETS--                               | 34 |
| SlMYBATV-X3   | -----MADWNRSSTSDN-ASVVPDSTRVVA-LETTNEETS--                               | 34 |
| SlMYBATV-X2   | -----MADWNRSSTSDN-ASVVPDSTRVVA-LETTNEETS--                               | 34 |
| GmMYB73       | -----MADIDR-SFDNN-VSAVSTESK-----SQVS--                                   | 24 |
| SlMYBATV-like | -----MADSDSSTSNY-AFIDSPPFEAK-----KEESL--                                 | 28 |

R3/bHLH-binding

C1

|               |                                                                            |     |
|---------------|----------------------------------------------------------------------------|-----|
| AtMYBL2       | VRPEVKQRNFSKDEDDLIKLHALLGNRWSLIAGRLPGRTDNEVRIHWETYLKRRKLVKMG-IDPTN---HRL   | 96  |
| MdMYB6        | LSPQVEHRAFTPEEDDMIIRAHARFGNKWATIAARLLNGRTDNAIKNHWNSTLKRKCSDDGGVDLNGGYDGHFL | 130 |
| PtrMYB182     | LRPDIKRGNFQDEEDLIKLHALLGNRWSLIAGRLPGRTDNEVKNYWNSHLKKKLIDMG-IDPNNHR-LNQI    | 130 |
| GhMYB6        | LRPDIKRGNFAQDEEDLIKLHALLGNRWSLIAGRLPGRTDNEVKNYWNSHIRKKLMKMG-IDPNNHK-LNQY   | 130 |
| PpMYB19       | LRPDIKRGNFQDEEDLIKLHALLGNRWSLIAGRLPGRTDNEVKNYWNSHIRKKLIKMG-IDPNNHR-LNQI    | 130 |
| VvMYBC2-L3    | LRPDLKRGNFQDEEDLIKLHALLGNRWSLIAGRLPGRTDNEVKNYWNSHIRKKLINMG-IDPNNHR-VNQS    | 130 |
| VvMYB4-like   | LRPDLKRGNFQDEEDLIKLHALLGNRWSLIAGRLPGRTDNEVKNYWNSHIRKKLINMG-IDPNNHR-VNQS    | 130 |
| VvMYBC2-L1    | LRPDLKRGDFAEDEEDLIKLHALLGNRWSLIAGRPPGRTDNEVKNYWNSHLRKKLINMG-IDPNNHR-LSHN   | 130 |
| PpMYB18       | LRPDLKRGNFAEDEEDLIVKLHALLGNRWSLIAGRLPGRTDNEVKNYWNSHLRKKLISMG-IDPNNHRPNTFN  | 131 |
| GmMYB100      | LRPDLKRGNFAEDEEDLIKLHALLGNRWSLIAGRLPGRTDNEVKNYWNSHIRKKLISKG-IDPNNHR-LKHT   | 130 |
| TrMYB133      | LRPDVKRGNFGEDEEDLIKLHALLGNRWSLIAGRLPGRTDNEVKNFWSRIKKLIRKG-IDPNNHN-LHHK     | 133 |
| PhMYB27       | LSPNLKRGNFSEDEEDLIKLHALLGNRWSLIAGRLPGRTDNEVKNYWNSHLRKKLIKMG-IDPKNHR-----   | 127 |
| SlMYB76       | LNPDLKRGNFSEDEEDLIKLHALLGNRWSLIAGRLPGRTDNEVKNYWNSHLTRKLIKMG-IDPKNHR-----   | 127 |
| VvMYBC2-L2    | LKPDVKRGNFGEDEEDLIKLHALLGNRWSLIAGRLPGRTDNEVKNYWNSHLKKKLMRMG-IDPNNHR-----   | 139 |
| MtMYB2        | LRPDIKRGIFAQDEEDLIKLHALLGNRWALIAAGRLPGRTDNEVKNYWNSHIRKKLIKMG-IDPNNHK-LHKG  | 130 |
| TrMYB134      | LRPDIKRGIFAQDEEDLIKLHALLGNRWALIAAGRLPGRTDNEVKNYWNSHIRKKLIKMG-IDPNNHK-LHKG  | 130 |
| FaMYB1        | LRPDLKRGSFGEDEEDLIRLHKLGNRWSLIAGRLPGRTDNEVKNYWNSHLKKKILKTG-TTLRPNK-----    | 126 |
| ZmMYB31       | LRPDLKRGNFTEDEEDLIVKLHSLGNKWSLIAGRLPGRTDNEIKNYWNTHIRKKLLSRG-IDPVTHRPVTEH   | 132 |
| ZmMYB42       | LRPDLKRGNFTEDEEDLIVKLHSLGNKWSLIAARLPGRTDNEIKNYWNTHIRKKLLGSG-IDPVTHRRVAGG   | 132 |
| VvMYB4a       | LRPDLKRGNFTEDEDELIKLHSLGNKWSLIAGRLPGRTDNEIKNYWNTHIRKKLLNRG-IDPSTHRPINE-    | 131 |
| PdMYB221      | LRPDLKRGNFTEDEDELIKLHSLGNKWSLIAGRLPGRTDNEIKNYWNTHIRKKLLNRG-IDPATHRPLNE-    | 131 |
| PpMYB17       | LRPDLKRGNFTEDEDELIKLHSLGNKWSLIAGRLPGRTDNEIKNYWNTHIRKKLLTRG-IDPTTHRALNE-    | 131 |
| AmMYB308      | LRPDLKRGNFTEDEDELIKLHSLGNKWSLIAGRLPGRTDNEIKNYWNTHIRKKLLSRG-IDPTTHRSINDG    | 132 |
| CmMYB1        | LRPDLKRGNFTEDEDELIKLHSLGNKWSLIAGRLPGRTDNEIKNYWNTHIRKKLLNRG-IDPATHRVPVDH    | 132 |
| PhMYB4        | LRPDLKRGNFTEDEDELIKLHSLGNKWSLIAGRLPGRTDNEIKNYWNTHIRKKLLSRG-IDPTTHRIMNE-    | 131 |
| SlMYB32       | LRPDLKRGNFTEDEDELIKLHSLGNKWSLIAGRLPGRTDNEIKNYWNTHIRKKLLSRG-IDPTTHRSIND-    | 131 |
| SlMYB7        | LRPDLKRGNFTEDEDELIKLHSLGNKWSLIAGRLPGRTDNEIKNYWNTHIRKKLLSRG-IDPTTHRPVNE-    | 131 |
| EgMYB1        | LRPDLKRGNFTEDEDELIKLHSLGNKWSLIAGRLPGRTDNEIKNYWNTHIRKKLLNRG-IDPATHRLINEP    | 132 |
| AtMYB32       | LRPDLKRGNFTEDEDDLIKLHSLGNKWSLIATRLPGRTDNEIKNYWNTHVKKLLRKG-IDPATHRPINET     | 132 |
| AtMYB7        | LRPDLKRGNFTHDEDELIKLHSLGNKWSLIAARLPGRTDNEIKNYWNTHIRKKLLSKG-IDPATHRGINEA    | 132 |
| AtMYB4        | LRPDLKRGNFTEDEDELIKLHSLGNKWSLIAGRLPGRTDNEIKNYWNTHIRKKLINRG-IDPTSHRPIQES    | 132 |
| LlMYB1        | LRPDLKRGNFTEDEDELIKLHSLGNKWSLIAGRLPGRTDNEMKNYWNTHIRKKLLSRG-IDPTTHRPLNDA    | 132 |
| AtMYB3        | LRPDLKRGNFTEDEDELIKLHSLGNKWSLIAGRLPGRTDNEIKNYWNTHIRKKLLSRG-IDPNSHRLIN--    | 130 |
| PpMYB20       | LRPDLKRGNFTEDEDELIKLHSLGNKWSLIAGRLPGRTDNEIKNYWNTHIRKKLISRG-LDPQTHRPLN--    | 130 |
| SlMYB3        | LRPDLKRGNFTEDEDELIKLHSLGNKWSVIAGRLPGRTDNEIKNYWNTHIRKKLISRG-IDPQTHRPLNN     | 132 |
| GbMYBF2       | LRPDLKRGLLSESEKLIIEELHAAIGNRWSLIAAQLPGRTDNEIKNYWNTIRKKLLRQMG-IDPVTHKPLNQM  | 132 |
| MdMYB10       | LKPNIKRGDFKDEYVDLIRLHRLGNRWSLIARRLPGRTDNAVKNYWNTRLRIDSRMKTVKKNSQEMRKTNV    | 131 |
| AtETC2        | -----FISMTEQEEDLISRMYRLVGNRWDLIAGRVVGRKANEIERYWIMRNSDYFSHKRRRLNNSPFFSTSP   | 103 |
| AtTRY         | -----FINMTEQEEDLIFRMYRLVGDRWDLIAGRVPGRPPEIERYWIMRNSEGFADKRRQLHSSSHKHTKP    | 96  |
| VvTRY         | -----FINMSEQEEDLIYRMYRLVGDRWDLIAGRIPGRKPEIERFWIMRNRQGYAERGKEASQKKQ-----    | 88  |
| SlTRY         | -----FIRMSKQEEDLIYRMHKLVGDRWGLIAGRIPGRTAEEIERFWIMRHSDFAHKRRQTIKKSLPPT--    | 94  |
| AtETC3        | -----VVNMSQEEDLVSRMHKLVGDRWELIAGRIPGRTAGEIERFWVMKN-----                    | 77  |
| AtETC1        | -----EIAMAQEEEDLICRMKLVGERWDLIAGRIPGRTAEEIERFWVMKN-----HRRSQLR-----        | 83  |
| AtCPC         | -----AVKMSEEEEDLISRMYKLVGDRWELIAGRIPGRTPEEIERYWLKMGVVFANRRRDRFFRK-----     | 94  |
| EcROI1        | -----QVQLSKDEEDLVIRMYNLVGDRWPLIAGRIPGRSADQIKKYWLSRYSTTAFPKQKINR-----       | 84  |
| ElROI1        | -----QVQLSEDEEDLVIRMYNLVGDRWPLIAGRIPGRSADQIKKYWLSRYSTTAFPKQKINR-----       | 84  |
| PhMYBx        | -----EIKFSEEEEDLIRMYNLVGERSWLIAGRIPGRSAEEIEKYWNTRSSSTSQ-----               | 85  |
| SlMYBATV-X1   | -----KLEFSEDEEMLIAMFSLVRERWSLIAGRIPGRNADEIEKYWKSYSKYSQEEIQAQSQDEAHGIRLI    | 101 |
| SlMYBATV-X3   | -----KLEFSEDEEMLIAMFSLVRERWSLIAGRIPGRNADEIEKYWKSYSKYSQ-----                | 84  |
| SlMYBATV-X2   | -----KLEFSEDEEMLIAMFSLVRERWSLIAGRIPGRNADEIEKYWKSYSKYSQ--ILGSM-----         | 89  |
| GmMYB73       | -----DVEFSEAEELIAMVYNLVGERWSLIAGRIPGRTAEEIEKYWTSRFSTSQ-----                | 74  |
| SlMYBATV-like | -----KLEFSQDEELITKMFNLVGERWSLIAGRIQELQMKLRSTGTQEIPTANKIFSFCYIWSYKRKK--     | 93  |

|               |                                                                          |     |
|---------------|--------------------------------------------------------------------------|-----|
| AtMYBL2       | HHHTNYISRRHLHS-----SHKEHETKIISDQSSSVS-----                               | 128 |
| MdMYB6        | RDHEQPPLKRSVSAGSGVPVSTGLYMSPGSPSGSDASDSSAQVMSLSDCHVYRPL-----             | 185 |
| PtrMYB182     | LPRLQAEP-AAPVIATST-----TTGSKNNVAASKPKNLS-----                            | 165 |
| GhMYB6        | P--HHVGP-LSPITNSM-----DVACKLRVFSTE-----                                  | 157 |
| PpMYB19       | IPRPNPQNDCVSAAATSS-----GSMSNISACTKAPIKSSR-----                           | 166 |
| VvMYBC2-L3    | F---AAPLNRCASAATM-----SSGSMTGACDNKSLKPS-----                             | 161 |
| VvMYB4-like   | F---AAPLNRCASAATM-----SSGSMTGACDNKSLKPS-----                             | 161 |
| VvMYBC2-L1    | FPRPRDPCTAATAT-----SSGLNHAS-PPVKS-VG-----                                | 160 |
| PpMYB18       | LPRPHHKNSQAISSTAKL-----SAGLKTPTNDQPARS-GG-----                           | 166 |
| GmMYB100      | IPSS--LQNSLMSDDSSK-----AFSMKDTNKNETSCLPRV-----                           | 164 |
| TrMYB133      | IPP---LQNQIMSN-SLK-----YFGLKEISKNETTKT-HL-----                           | 164 |
| PhMYB27       | -----ISHYLH-----RKRLEYWSENSS--RG-----                                    | 147 |
| SlMYB76       | -----LSHYLH-----IKRLELLQENNT--RL-----                                    | 147 |
| VvMYBC2-L2    | -----LGERASG-----TSKSFESRDQTSNPLISA-----                                 | 164 |
| MtMYB2        | FPT-----VGTSS-----CVESMNKKNKLS-IKS-----                                  | 154 |
| TrMYB134      | FPSP---HHVFAAGTSSS-----SCDKERNINNLTLIKSKS-----                           | 163 |
| FaMYB1        | -----PHENNHAPNNKLVKLFN-----                                              | 143 |
| ZmMYB31       | HASNITISFETEVAARDD-----KKGAVFRLEEEERKAT-----                             | 170 |
| ZmMYB42       | AATTISFQSPNTAVAAAAE-----TAAQAPIKAEETAAVKAP-----                          | 170 |
| VvMYB4a       | PSPDV--TTISFA-----AAVKEE-EKINISSTG-----                                  | 157 |
| PdMYB221      | PAQEAS-TTISFSTTTSVKEE-----SLSSVKEESNKEKIIISAA-----                       | 169 |
| PpMYB17       | AAQDSATTISFAAS-----ANIKEEDQKSSIIIN-----                                  | 160 |
| AmMYB308      | TASQDQVTTISFSNANSKE-----EDTKHKVAVDIMIKEE-----                            | 167 |
| CmMYB1        | PTTTTTTTTTVATTVNNHNVTSPPPDIISFATTKTTHVVKNEDEMEQETK-----                  | 183 |
| PhMYB4        | PSTQ-KVTTISFAAGNEDIK-----DQKISIKAEFEQIK-----                             | 164 |
| SlMYB32       | PTTIPKVTITFAAAHENIKDIDQ-----QDEMINIKAEFVETSKES-----                      | 173 |
| SlMYB7        | PGTTQKVTISFAGGDHKTKDIEED-----HNKMINVKAESGLSQ-----                        | 171 |
| EgMYB1        | AQDHHDEPTISFAANSKE-----IKEMKNAELNFMCN-----                               | 165 |
| AtMYB32       | KTSQDSSDSSKTEDPLVK---ILSFG---PQLEKIANFG--DERIQKRV-----                   | 173 |
| AtMYB7        | KIS---DLKKTQDQIVK---DVSFV---TKFEETDKSG--DQKQNKYIRN-----                  | 171 |
| AtMYB4        | SASQ---DSKPTQLEPVTSNTINISFTS-APKVETFHESISFPGKSEKISML-----                | 180 |
| LlMYB1        | SQNQSHASSASAQKQHDS-----EILITDTDANSKRP-----                               | 164 |
| AtMYB3        | --ESVSPSSLQNDVVETIH-----LDFSGVPKPEPVREEIG-----MVNNCES-----               | 172 |
| PpMYB20       | --DTTAAAAAA-ATTPASR-----LDFRNISPPSAVDKTTNKNLSILHHTINKTSSNNNNHNS          | 187 |
| SlMYB3        | ATNSHTTTNITTAVTKNIN-----LDFTNVDQKQPNIMIATSS-----SYDETKCN-----            | 179 |
| GbMYBF2       | QMDYMRPHAPMNAEENKFEF-----PLEPENVAEASSPENIRG-----                         | 172 |
| MdMYB10       | IRPQPQKFNRSYYLSSKEP-----ILDHIQSAEDLSTPPQTSSTK-----                       | 173 |
| AtETC2        | LNLQENLKL-----                                                           | 112 |
| AtTRY         | HRPRFSIYPS-----                                                          | 106 |
| VvTRY         | -----                                                                    | -   |
| SlTRY         | -----                                                                    | -   |
| AtETC3        | -----                                                                    | -   |
| AtETC1        | -----                                                                    | -   |
| AtCPC         | -----                                                                    | -   |
| EcROI1        | -----                                                                    | -   |
| EIROI1        | -----                                                                    | -   |
| PhMYBx        | -----                                                                    | -   |
| SlMYBATV-X1   | EKTGPSTGHPQQCVFPEKKPISVCQPSDIGPQLLGPTTNGPQQLLGPKTTPGNITVDQKLVNPAQDQINQ-- | 172 |
| SlMYBATV-X3   | -----                                                                    | -   |
| SlMYBATV-X2   | -----                                                                    | -   |
| GmMYB73       | -----                                                                    | -   |
| SlMYBATV-like | -----                                                                    | -   |



|               |                                                                     |     |
|---------------|---------------------------------------------------------------------|-----|
| AtMYBL2       | -----LPALCLQDSSESSTNGSTGQETLLLF-----                                | 195 |
| MdMYB6        | -----NQVAPVTESTQAPAPAPVSTTSVAVQNIPVELLAVMQGMIRKEVRNYMAGLEQSG-----   | 285 |
| PtrMYB182     | -----TTFGNQNNCKWGKTSQVERDPSSL-----                                  | 238 |
| GhMYB6        | -----NIIEESQQKTASIVTNDEE-EQYTV-----                                 | 219 |
| PpMYB19       | -----GEEMQKNIKGSFTMAREIETNLQHS-----                                 | 231 |
| VvMYBC2-L3    | -----DVIDKKRQDTKSI FSREVEGDAN-----                                  | 221 |
| VvMYB4-like   | -----DVIDKKRQDTKSI FSREVEGDAN-----                                  | 221 |
| VvMYBC2-L1    | -----DTTEEAKKHNEPKVSRELEPGPS-----                                   | 218 |
| PpMYB18       | -----ENLKEEQNLMSLKCHRNLPRPPI-----                                   | 229 |
| GmMYB100      | -----ISGNNVKPFHESNSSRKVQFDSP-----                                   | 224 |
| TrMYB133      | -----                                                               | -   |
| PhMYB27       | -----SSCAQP-----                                                    | 184 |
| S1MYB76       | -----                                                               | -   |
| VvMYBC2-L2    | -----EQMQLTGANSHKELEPAPF-----                                       | 219 |
| MtMYB2        | -----IVIPNCESPKTRDMIDLNC-----                                       | 213 |
| TrMYB134      | -----DCESPKIRDIDIDLNC-----                                          | 218 |
| FaMYB1        | -----GMADPQVA-----                                                  | 187 |
| ZmMYB31       | MRVRPAVKREA-----GLCFGCSLGLPR-TADCKCSS-----SSFLGLR-----              | 261 |
| ZmMYB42       | LIKPAVVKREALQAGHGHGHLCLGCGLGGQKGAAGCSCSNG-----HHFLGLR-----          | 248 |
| VvMYB4a       | TPLKTGGRSS-----TTLCFACSLGIPN-SEECSCS-----IGTSSGS--SSSGYDFLGL--      | 238 |
| PdMYB221      | QAFKTGG--S-----TSLCFACSLGLQN-SKDCSCSVIVG-----TIGSSSSAG-SKTGYDFLGM-- | 255 |
| PpMYB17       | EPLKSGG-----RGVCFSCSLGLQD-AKNCSCG--ID-----TIGSSTSGTTNVGYDFLGL--     | 243 |
| AmMYB308      | ENLKTGGRNGS-----STLCFVCRLGIQN-SKDCSCSDG-----VGN-----                | 232 |
| CmMYB1        | QPLMTGG-----TICFACSLGVQD-NKECRCSTNGT-----SGNNSNVGFDFFKI--           | 268 |
| PhMYB4        | LQQSTTGSGGA-----STICFTCSLGLKN-NKGCSCSRNR-----SMN-VAGYDFLGLK--       | 244 |
| S1MYB32       | RHHQRS-----SSLCFACSLGIQN-SKDCSCGSESGN-----GWSNNMVSMNIMAGYDFLGLK--   | 260 |
| S1MYB7        | -----PSRCFACSLGIQN-SKDCNCSKNN-----IASYNFLGLK--                      | 239 |
| EgMYB1        | PLLRFTR--K-----SDLCXECNLGLKN-SQNCRCSVG-----VIESETSVGYDFLGL--        | 246 |
| AtMYB32       | HDERNLRFGRV-----KYRCSACRFVGN-GKECSCNNVKQTEDSSSSSYSSDISSS-IGYDFLGLNN | 262 |
| AtMYB7        | -----RE-----ISTCTASRFYMN-DMECSSETVKCQTENSSSISYSSIDISSSNVGYDFLGLK--  | 257 |
| AtMYB4        | LQHG--KST-----TPRCFKCSLGMIN-GMECRCGRMCDVVGSS--KGSMSNG--FDFLGLAK     | 267 |
| L1MYB1        | -----HQQPDQISLKSIN-SESSTAGDG-----FDFLESK--                          | 215 |
| AtMYB3        | SVVDSAESTRR-----WGSELF--AHESDAVCLCCRIG-----LFRNES                   | 245 |
| PpMYB20       | SGNSAESRLQQ-----NNYQVFGTVHKAGVTQAVLCCQVG-----FQSSDA                 | 297 |
| S1MYB3        | STASYNFLTTV-----APPPTAAVPAEMMAKTVCLCWQIG-----YHGGGG                 | 263 |
| GbMYBF2       | IVDQVN-----NPLSDSHKNNANNMTTSCCSFNNGN--IHSRSSDIKAETPSLWGDQMGVLG      | 286 |
| MdMYB10       | -----LSPRSCANFPEGQSRSEFSFS-----                                     | 233 |
| AtETC2        | -----                                                               | -   |
| AtTRY         | -----                                                               | -   |
| VvTRY         | -----                                                               | -   |
| S1TRY         | -----                                                               | -   |
| AtETC3        | -----                                                               | -   |
| AtETC1        | -----                                                               | -   |
| AtCPC         | -----                                                               | -   |
| EcROI1        | -----                                                               | -   |
| E1ROI1        | -----                                                               | -   |
| PhMYBx        | -----                                                               | -   |
| S1MYBATV-X1   | -----                                                               | -   |
| S1MYBATV-X3   | -----                                                               | -   |
| S1MYBATV-X2   | -----                                                               | -   |
| GmMYB73       | -----                                                               | -   |
| S1MYBATV-like | -----                                                               | -   |

## TLLLFR

|               |                                                               |     |
|---------------|---------------------------------------------------------------|-----|
| AtMYBL2       | -----                                                         | -   |
| MdMYB6        | VCFQQAAGNEGFWNVGVKRIQFSRIE-----                               | 312 |
| PtrMYB182     | ---PTLLLFR-----                                               | 245 |
| GhMYB6        | ---PTLLLFR-----                                               | 226 |
| PpMYB19       | ---PTLALFR-----                                               | 238 |
| VvMYBC2-L3    | ---PTLILFR-----                                               | 228 |
| VvMYB4-like   | ---PTLILFR-----                                               | 228 |
| VvMYBC2-L1    | ---STLLLFQ-----                                               | 225 |
| PpMYB18       | ---SFLS-----                                                  | 233 |
| GmMYB100      | ---STLLLFQ-----                                               | 231 |
| TrMYB133      | -----                                                         | -   |
| PhMYB27       | -----                                                         | -   |
| S1MYB76       | -----                                                         | -   |
| VvMYBC2-L2    | ---TLLLFQ-----                                                | 226 |
| MtMYB2        | -----                                                         | -   |
| TrMYB134      | -----                                                         | -   |
| FaMYB1        | -----                                                         | -   |
| ZmMYB31       | ---TAMLDFRSLEMK-----                                          | 273 |
| ZmMYB42       | ---TSVLDYRGLLEMK-----                                         | 260 |
| VvMYB4a       | ---TSGVLDYRGLLEMK-----                                        | 251 |
| PdMYB221      | ---KSGVLDYRGLLEMK-----                                        | 268 |
| PpMYB17       | ---KSGVLDYRSLEMK-----                                         | 256 |
| AmMYB308      | -----                                                         | -   |
| CmMYB1        | ---KNGALDYRSLEMK-----                                         | 281 |
| PhMYB4        | ---TNG-LDYRTLETETK-----                                       | 258 |
| S1MYB32       | ---TNGLLDYRTLETETK-----                                       | 273 |
| S1MYB7        | ---SNGVLDYRTLETETK-----                                       | 252 |
| EgMYB1        | ---KASVLDYRS-----                                             | 255 |
| AtMYB32       | ---TRVLDYRSTLEMK-----                                         | 274 |
| AtMYB7        | ---TRILDFRSLEMK-----                                          | 269 |
| AtMYB4        | KETTSLGFRSLEMK-----                                           | 282 |
| L1MYB1        | ---SSVLDYRSTVTQIDWRALTE-----                                  | 235 |
| AtMYB3        | ---CRNCRVSD--VRTH-----                                        | 257 |
| PpMYB20       | ---CRNCQCTNGFYRFHRPLNS-----                                   | 316 |
| S1MYB3        | QWCGKCKNTNGFYRYC-----                                         | 279 |
| GbMYBF2       | DPISDYLQWNDLELWSAGLDAASGWIQQQLPECNWSEMQGDIEISSNCPQLRLASILDDEM | 346 |
| MdMYB10       | ---TDLWNHSKEE-----                                            | 243 |
| AtETC2        | -----                                                         | -   |
| AtTRY         | -----                                                         | -   |
| VvTRY         | -----                                                         | -   |
| S1TRY         | -----                                                         | -   |
| AtETC3        | -----                                                         | -   |
| AtETC1        | -----                                                         | -   |
| AtCPC         | -----                                                         | -   |
| EcROI1        | -----                                                         | -   |
| E1ROI1        | -----                                                         | -   |
| PhMYBx        | -----                                                         | -   |
| S1MYBATV-X1   | -----                                                         | -   |
| S1MYBATV-X3   | -----                                                         | -   |
| S1MYBATV-X2   | -----                                                         | -   |
| GmMYB73       | -----                                                         | -   |
| S1MYBATV-like | -----                                                         | -   |

**Fig. S3** Multiple sequence alignment of MYB flavonoid repressor based on its full-length proteins. Entire protein sequences were aligned by using Clustal X ver. 2 (Larkin *et al.*, 2007) with default settings, and the conserved amino acids were shaded by using GeneDoc (2.6) (Nicholas *et al.*, 1997). The R2, R3/bHLH-binding, C1, C2/EAR, and TLLLFR domains (or motifs) are marked above the alignment.

R2

|               |        |                 |        |            |            |            |              |                         |              |    |
|---------------|--------|-----------------|--------|------------|------------|------------|--------------|-------------------------|--------------|----|
| MtMYB2        | -MRKPC | CDKE            | NIN    | KGAWSKQEDQ | KLIDYIQV   | HGEGCWGS   | IPKAAGL      | HRCGKSCRLRWL            | 57           |    |
| TrMYB134      | -MRTPC | CDKE            | NIN    | KGAWSKQEDK | KLIDYIQV   | HGEGCWGS   | IPKAAGL      | HRCGKSCRLRWL            | 57           |    |
| PtrMYB182     | -MRKPC | CDKR            | GNN    | KGAWSTEEDQ | KLIDYIQT   | HGEGCWS    | IPEAAGL      | HRCGKSCRLRWI            | 57           |    |
| GhMYB6        | -MRKPC | CDKQ            | GTN    | KGAWSKQEDQ | KLIDYIRI   | HGEGCWS    | SLPKAAGL     | HRCGKSCRLRWI            | 57           |    |
| PpMYB19       | -MRKPC | CEKE            | GTN    | KGAWSKQEDQ | KLIDYIKA   | HGEGCWS    | SLPKAAGL     | HRCGKSCRLRWI            | 57           |    |
| VvMYBC2-L3    | -MRKPC | CDKK            | DTT    | KGAWSKQEDQ | RLIDYIKT   | HGEGCWS    | SLPKAAGL     | HRCGKSCRLRWI            | 57           |    |
| VvMYB4-like   | -MRKPC | CDKK            | DTT    | KGAWSKQEDQ | RLIDYIKT   | HGEGCWS    | SLPKAAGL     | HRCGKSCRLRWI            | 57           |    |
| VvMYBC2-L1    | -MRKPC | CDKQ            | DTN    | KGAWSKQEDQ | KLIDYIRKN  | HGEGCWRTLP | QAAGL        | LRCGKSCRLRWI            | 57           |    |
| PpMYB18       | -MRKPC | CDKQ            | DTN    | KGAWSKQEDL | KLIDYIRK   | HGEGCWRTLP | QAAGL        | LRCGKSCRLRWI            | 57           |    |
| GmMYB100      | -MRKPS | CDIK            | DLN    | KGAWSKQEDQ | KLIDYIKK   | HGEVCWRTLP | QAAGL        | HRCGKSCRLRWI            | 57           |    |
| TrMYB133      | -MRKPS | CDIK            | LEKNIN | KVWSKQEDQ  | KLIDYINK   | HGEVCWSTLP | QAAGL        | LRCGKSCRLRWM            | 60           |    |
| PhMYB27       | -MRKAC | CDNK            | EEM    | HGAWSKQEDQ | KLIDYITK   | HGAGCWRNLP | KADGL        | LRCGKSCRLRWM            | 58           |    |
| SlMYB76       | -MRKPC | CDNK            | EEM    | HGAWSKQEDQ | KLIDYITK   | HGEGCWRNLP | KAAGL        | LRCGKSCRLRWM            | 58           |    |
| FaMYB1        | -MRKPC | CEKT            | ETT    | KGAWSIQEDQ | KLIDYIQK   | HGEGCWNSLP | KAAGL        | LRCGKSCRLRWI            | 57           |    |
| VvMYBC2-L2    | -MRK   | PAGYGEKKSTKKRVG | CEKK   | FTN        | KGAWSKQEDQ | KLIDYIQK   | HGEGCWSSLP   | QSAGL                   | LRCGKSCRLRWV | 70 |
| VvMYB4a       | MGRSPC | CEKA            | HTN    | KGAWTKEED  | RLIAYIRA   | HGEGCWS    | SLPKAAGL     | LRCGKSCRLRWI            | 58           |    |
| PpMYB17       | MGRSPC | CEKA            | HTN    | KGAWTKEED  | RLIAYIRA   | HGEGCWS    | SLPKAAGL     | LRCGKSCRLRWI            | 58           |    |
| EgMYB1        | MGRSPC | CEKA            | HTN    | KGAWTKEED  | KL IAYIRA  | HGEGCWS    | SLPKAAGL     | LRCGKSCRLRWI            | 58           |    |
| CmMYB1        | MGRSPC | CEKA            | HTN    | KGAWTKEED  | RLIAYIRT   | HGEGCWS    | SLPKAAGL     | LRCGKSCRLRWI            | 58           |    |
| PdMYB221      | MGRSPC | CEKA            | HTN    | KGAWTKEED  | RLIAYIRT   | HGEGCWS    | SLPKAAGL     | LRCGKSCRLRWI            | 58           |    |
| AmMYB308      | MGRSPC | CEKA            | HTN    | KGAWTKEED  | RLVAYIRA   | HGEGCWS    | SLPKAAGL     | LRCGKSCRLRWI            | 58           |    |
| LlMYB1        | MGRSPC | CEKA            | HTN    | KGAWTKEED  | RLVAYIRA   | HGEGCWS    | SLPKAAGL     | LRCGKSCRLRWI            | 58           |    |
| PhMYB4        | MGRSPC | CEKA            | HTN    | KGAWTKEED  | ERL IAYIKA | HGEGCWS    | SLPKAAGL     | LRCGKSCRLRWI            | 58           |    |
| AtMYB4        | MGRSPC | CEKA            | HTN    | KGAWTKEED  | ERL VAYIKA | HGEGCWS    | SLPKAAGL     | LRCGKSCRLRWI            | 58           |    |
| ZmMYB31       | MGRSPC | CEKA            | HTN    | KGAWTKEED  | ERLVAHIRA  | HGEGCWS    | SLPKAAGL     | LRCGKSCRLRWI            | 58           |    |
| ZmMYB42       | MGRSPC | CEKA            | HTN    | KGAWTKEED  | ERLVAYVRA  | HGEGCWS    | SLPRAAGL     | LRCGKSCRLRWI            | 58           |    |
| SlMYB7        | MGRSPC | CEKA            | HTN    | KGAWTKEED  | ERLSYIKT   | HGEGCWS    | SLPKAAGL     | LRCGKSCRLRWI            | 58           |    |
| SlMYB32       | MGRSPC | CEKA            | HTN    | KGAWTKEED  | ERLSYIRA   | HGEGCWS    | SLPKAAGL     | LRCGKSCRLRWI            | 58           |    |
| PpMYB20       | MGRSPC | CEKA            | HTN    | KGAWTKEED  | QLIDYIRV   | HGEGCWS    | SLPKAAGL     | LRCGKSCRLRWI            | 58           |    |
| SlMYB3        | MGRSPC | CEKA            | HTN    | KGAWTKEED  | QLIN YIRA  | HGEGCWS    | SLPKAAGL     | SRCGKSCRLRWI            | 58           |    |
| AtMYB3        | MGRSPC | CEKA            | HMN    | KGAWTKEED  | QLLDYIRK   | HGEGCWS    | SLPRAAGL     | QRCGKSCRLRWM            | 58           |    |
| AtMYB7        | MGRSPC | CEKE            | HMN    | KGAWTKEED  | RLVSYIKS   | HGEGCWS    | SLPRAAGL     | LRCGKSCRLRWI            | 58           |    |
| PtrMYB57      | MGRSPC | CEKE            | HTN    | KGAWTKEED  | ERL INYIKS | HGEGCWS    | SLPKAAGL     | LRCGKSCRLRWI            | 58           |    |
| AtMYB32       | MGRSPC | CEKD            | HTN    | KGAWTKEED  | DKLSYIKA   | HGEGCWS    | SLPRSAGL     | QRCGKSCRLRWI            | 58           |    |
| GbMYBF2       | MGRQPC | CDKA            | GLK    | KGPWTAEDR  | KL VNFITT  | HGEGCWRE   | VPKLAGL      | LRCGKSCRLRWT            | 58           |    |
| MdMYB10       | MEGYN  | ENL             | SVR    | KGAWTREED  | NLLRQCVEI  | HGEGKWNQ   | YSYKAGL      | NRCRKSCRQ               | RWL          | 56 |
| MdMYB6        | MAVSRK | DMD             | RIK    | GPWSPEED   | DSLQRLVQK  | HGPRNWSL   | LSKSI        | PGRSGKSCRLRWC           | 55           |    |
| AtMYBL2       |        |                 |        |            |            |            | MNKTRLRAL    | SPPSG-MQHRKRCRLRGR      | 26           |    |
| AtETC2        |        |                 |        |            |            |            | MDNTNRLRLRRG | PSLRQTKFTRSRYDS         | E            | 28 |
| AtTRY         |        |                 |        |            |            |            | MDNTDRRRRR   | KQHKIA-LHDS             | E            | 21 |
| VvTRY         |        |                 |        |            |            |            | MD           | RRRR-KLPKIA-APSQS       | E            | 18 |
| SlTRY         |        |                 |        |            |            |            | MDQN         | HHRHK-LMHHRCC-SHE       | E            | 21 |
| AtETC3        |        |                 |        |            |            |            | MDNHRRT      | KQP-KTN-SIVTSSE         | T            | 23 |
| AtETC1        |        |                 |        |            |            |            | MNTQRKS      | KHL-KTNPTIVASSE         |              | 22 |
| AtCPC         |        |                 |        |            |            |            | MFRSDKA      | EKMDKRR-RRQSKAKASCSE    |              | 26 |
| EcROI1        |        |                 |        |            |            |            | MAS          | SENSSSD-DYFSTSQE        | V            | 19 |
| ElROI1        |        |                 |        |            |            |            | MAS          | SENSSSD-DYFSTSQE        | V            | 19 |
| PhMYBx        |        |                 |        |            |            |            | MADKGQ       | SSSSV-NTPADSQDGVAPMLV   |              | 27 |
| SlMYBATV-X2   |        |                 |        |            |            |            | MAD          | WNRSSTS-DNASVSPDSTRVVAL |              | 26 |
| SlMYBATV-X3   |        |                 |        |            |            |            | MAD          | WNRSSTS-DNASVSPDSTRVVAL |              | 26 |
| SlMYBATV-X1   |        |                 |        |            |            |            | MAD          | WNRSSTS-DNASVSPDSTRVVAL |              | 26 |
| SlMYBATV-like |        |                 |        |            |            |            | MAD          | SDSSSTS-NYAFIDSP        | PF           | 20 |
| GmMYB73       |        |                 |        |            |            |            | MAD          | IDRSFDN-NVSAVSTE        |              | 18 |



### R3/bHLH-binding

|               |                                                            |     |
|---------------|------------------------------------------------------------|-----|
| MtMYB2        | NYLRPDIKRGIFAQDEEDLI IKLHALLGNRWAL IAGRLPGRDNEVKNYWNSHIR   | 112 |
| TrMYB134      | NYLRPDIKRGIFAQDEEDLI IKLHALLGNRWAL IAGRLPGRDNEVKNYWNSHIR   | 112 |
| PtrMYB182     | NYLRPDIKRGNFGQDEEDLI IKLHALLGNRWSL IAGRLPGRDNEVKNYWNSHLK   | 112 |
| GhMYB6        | NYLRPDIKRGNFAQDEEDLI IKLHALLGNRWSL IAGRLPGRDNEVKNYWNSHIK   | 112 |
| PpMYB19       | NYLRPDIKRGNFEQDEEDLI IKLHALLGNRWSL IAGRLPGRDNEVKNYWNSHIR   | 112 |
| VvMYBC2-L3    | NYLRPDLKRGNFGQDEEDLI IKLHALLGNRWSL IAGRLPGRDNEVKNYWNSHIR   | 112 |
| VvMYB4-like   | NYLRPDLKRGNFGQDEEDLI IKLHALLGNRWSL IAGRLPGRDNEVKNYWNSHIR   | 112 |
| VvMYBC2-L1    | NYLRPDLKRGDFAEDEEDLI IKLHALLGNRWSL IAGRLPGRDNEVKNYWNSHLR   | 112 |
| PpMYB18       | NYLRPDLKRGNFAEDEEDLI IKLHALLGNRWSL IAGRLPGRDNEVKNYWNSHLR   | 112 |
| GmMYB100      | NYLRPDLKRGNFAEDEEDLI IKLHALLGNRWSL IAGRLPGRDNEVKNYWNSHIR   | 112 |
| TrMYB133      | NYLRPDKRGNFGQDEEDLI IKLHALLGNRWSL IAGRLPGRDNEVKNFWSRIR     | 115 |
| PhMYB27       | NYLSPNLKRGNFSEDEEDLI IKLHALLGNRWSL IAGRLPGRDNEVKNYWNSHLR   | 113 |
| S1MYB76       | NYLNPNLKRGNFSEDEDDL IKLHALLGNRWSL IAGRLPGRDNEVKNYWNSHLT    | 113 |
| FaMYB1        | NYLRPDLKRGSFGEDEEDLI IRLHKL LGNRWSL IAGRLPGRDNEVKNYWNSHLK  | 112 |
| VvMYBC2-L2    | NYLKPDKRGNFGQDEEDLI IKLHALLGNRWSL IAGRLPGRDNEVKNYWNSHLK    | 125 |
| VvMYB4a       | NYLRPDLKRGNFTBEDEDELI IKLHSL LGNKWSL IAGRLPGRDNEIKNYWNTHIR | 113 |
| PpMYB17       | NYLRPDLKRGNFTBEDEDELI IKLHSL LGNKWSL IAGRLPGRDNEIKNYWNTHIR | 113 |
| EgMYB1        | NYLRPDLKRGNFTBEDEDEI IKLHSL LGNKWSL IAGRLPGRDNEIKNYWNTHIR  | 113 |
| CmMYB1        | NYLRPDLKRGNFTBEDEDELI IKLHSL LGNKWSL IAGRLPGRDNEIKNYWNTHIR | 113 |
| PdMYB221      | NYLRPDLKRGNFTBEDEDELI IKLHSL LGNKWSL IAGRLPGRDNEIKNYWNTHIR | 113 |
| AmMYB308      | NYLRPDLKRGNFTBEDEDELI IKLHSL LGNKWSL IAGRLPGRDNEIKNYWNTHIR | 113 |
| L1MYB1        | NYLRPDLKRGNFTBEDEDELI IKLHSL LGNKWSL IAGRLPGRDNEIKNYWNTHIR | 113 |
| PhMYB4        | NYLRPDLKRGNFTBEDEDELI IKLHSL LGNKWSL IAGRLPGRDNEIKNYWNTHIR | 113 |
| AtMYB4        | NYLRPDLKRGNFTBEDEDELI IKLHSL LGNKWSL IAGRLPGRDNEIKNYWNTHIR | 113 |
| ZmMYB31       | NYLRPDLKRGNFTBEDEDELI IKLHSL LGNKWSL IAGRLPGRDNEIKNYWNTHIR | 113 |
| ZmMYB42       | NYLRPDLKRGNFTAEDDDL IVKLHSL LGNKWSL IAARLPGRDNEIKNYWNTHIR  | 113 |
| S1MYB7        | NYLRPDLKRGNFTBEDEDELI IKLHSL LGNKWSL IAGRLPGRDNEIKNYWNTHIR | 113 |
| S1MYB32       | NYLRPDLKRGNFTBEDEDELI IKLHSL LGNKWSL IAGRLPGRDNEIKNYWNTHIR | 113 |
| PpMYB20       | NYLRPDLKRGNFTBEDEDELI IKLHSL LGNKWSL IAGRLPGRDNEIKNYWNTHIK | 113 |
| S1MYB3        | NYLRPDLKRGNFTBEDEDELI IKLHSL LGNKWSV IAGRLPGRDNEIKNYWNTHIK | 113 |
| AtMYB3        | NYLRPDLKRGNFTBEDEDELI IKLHSL LGNKWSL IAGRLPGRDNEIKNYWNTHIK | 113 |
| AtMYB7        | NYLRPDLKRGNFTHDEDELI IKLHSL LGNKWSL IAARLPGRDNEIKNYWNTHIK  | 113 |
| PtrMYB57      | NYLRPDLKRGNFSDEDEDELI INLHSL LGNKWSL IAARLPGRDNEIKNYWNTHIK | 113 |
| AtMYB32       | NYLRPDLKRGNFTLEDDDL IKLHSL LGNKWSL IATRLPGRDNEIKNYWNTHVK   | 113 |
| GbMYBF2       | NYLRPDLKRGLLSESEKLI TELHAATGNRWSR IAAQLPGRDNEIKNYWNTRIK    | 113 |
| MdMYB10       | NYLKPNIKRGDFKEDVDLI IRLHRL LGNRWSL IARLPGRDNEIKNYWNTRLR    | 111 |
| MdMYB6        | NQLSPQVHEHRAFTPEBDDMI IRAHARFGKWTI ARLNGRDNEIKNHWNSTLK     | 110 |
| AtMYBL2       | NYVRPEVKQRNFSKDEDDL I LKLHALLGNRWSL IAGRLPGRDNEVRIHWETYLK  | 81  |
| AtETC2        | EVSSIEWEFISMTEQEEDLISRMYRLVGDRWDL IAGRVVGRKANEIERYWIMRNS   | 83  |
| AtTRY         | EVSSIEWEFINMTEQEEDLIFRMYRLVGDRWDL IAGRVPGRQPEEIERYWIMRNS   | 76  |
| VvTRY         | EVSSIEWEFINMSEQEEDLIYRMYRLVGDRWDL IAGRIPGRKPEEIERFWIMRNR   | 73  |
| S1TRY         | EVNSMEWEIFIRMSKQEEDLIYRMHKLVGDRWGL IAGRIPGRTAEEIERFWIMRHS  | 76  |
| AtETC3        | EVSSLEWEVVNMSQEEDLVS RMHKLVGDRWEL IAGRIPGRTAGEEIERFWVMKN-  | 77  |
| AtETC1        | EVSSLEWEEIAMAQEEDLICRMYKLVGERWDL IAGRIPGRTAEEIERFWVMKNH    | 77  |
| AtCPC         | EVSSIEWEAVKMSBEEDLISRMYKLVGERWEL IAGRIPGRTPPEEIERYWL MKHG  | 81  |
| EcROI1        | NKKETKV-QVQLSKDEEDLVRMYNLVGDRWPL IAGRIPGRSADQIKKYWLSRYS    | 73  |
| E1ROI1        | NKKEKSV-QVQLSEDEEDLVRMYNLVGDRWPL IAGRIPGRSADQIKKYWLSRYS    | 73  |
| PhMYBx        | SGKTSKVAEIKFSBEEDLI RMYNLVGERWSL IAGRIPGRSAEEIEKYWNTRSS    | 82  |
| S1MYBATV-X2   | ETTNEETSKLEFSDEEMLIAKMFSLVRERWSL IAGRIPGRNADEIEKYWWSKYS    | 81  |
| S1MYBATV-X3   | ETTNEETSKLEFSDEEMLIAKMFSLVRERWSL IAGRIPGRNADEIEKYWWSKYS    | 81  |
| S1MYBATV-X1   | ETTNEETSKLEFSDEEMLIAKMFSLVRERWSL IAGRIPGRNADEIEKYWWSKYS    | 81  |
| S1MYBATV-like | EAKKEESLKLKLEFSQDEEILITKMFNLVGERWSL IAGRIQGEIQMQLRSTGTQETP | 75  |
| GmMYB73       | --KSSQVSDVEFSAEIEILIAMVYNLVGERWSL IAGRIPGRTAEEIEKYWTSRFS   | 71  |

**Fig. S4** Multiple sequence alignment of MYB flavonoid repressor based on the R3 and R2R3 domains. The N-terminal protein sequences comparing the R2R3 domain or only the R3 domain for small MYB proteins were aligned by using Clustal X ver. 2 (Larkin *et al.*, 2007) with default settings, and the conserved amino acids were shaded by using GeneDoc (2.6) (Nicholas *et al.*, 1997). The R2 and R3/bHLH-binding domains are marked above the alignment.

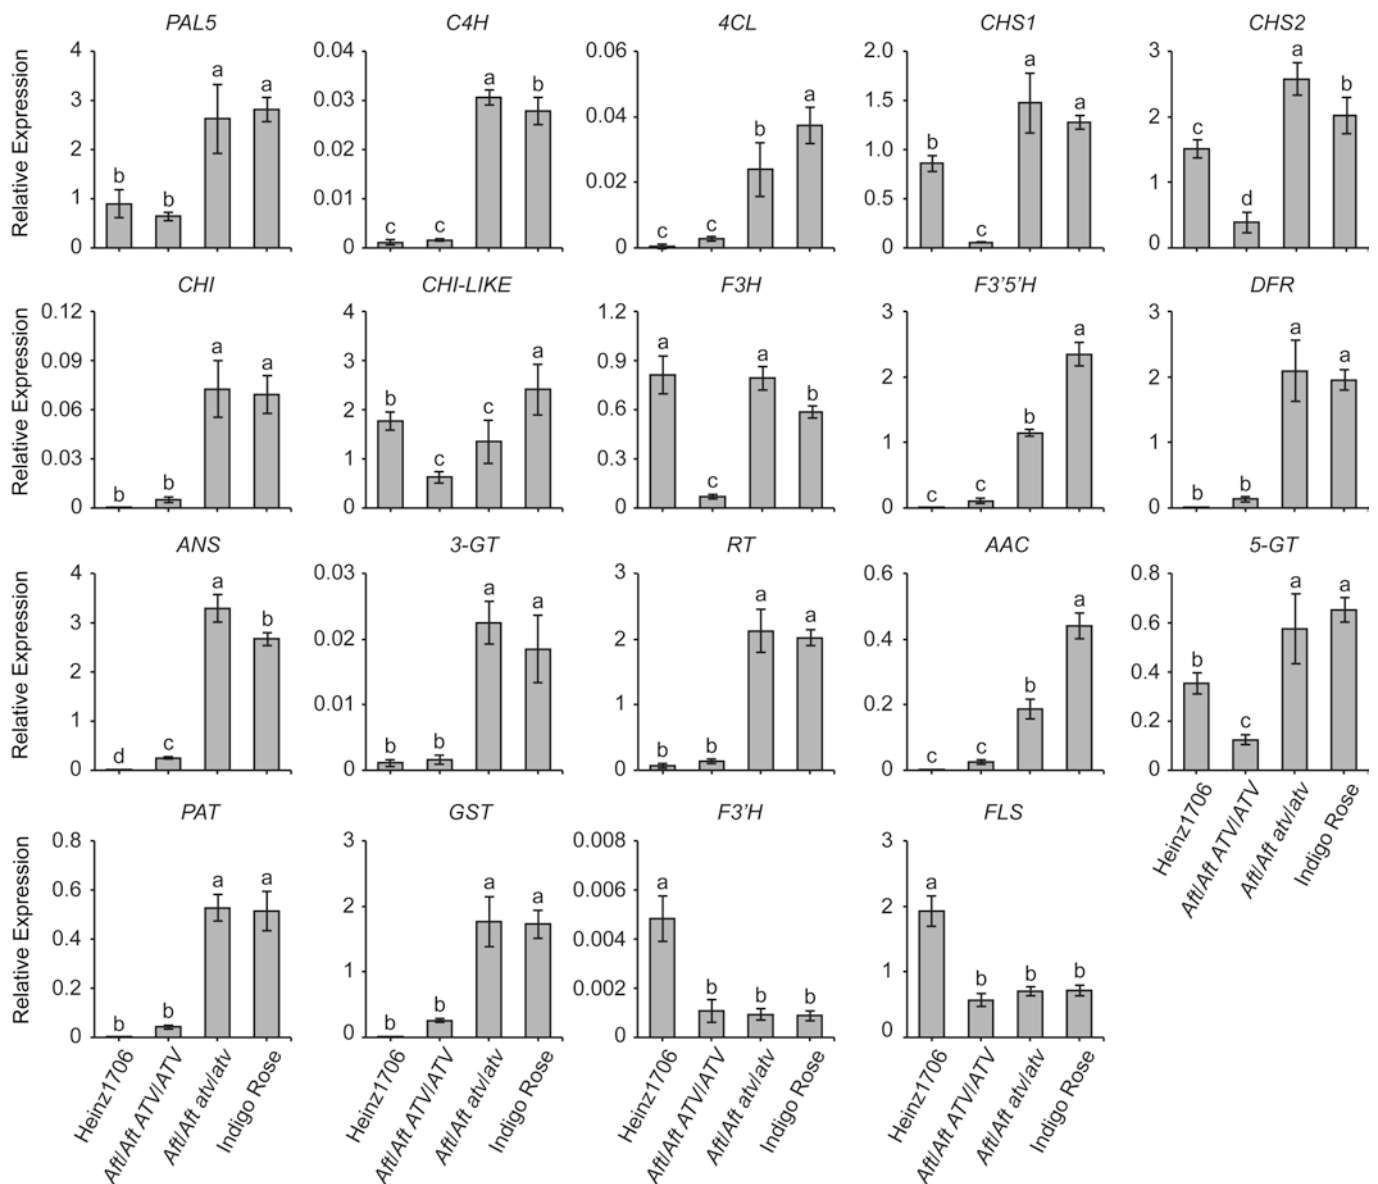

**Fig. S5** Transcriptional analysis of the structural genes of the anthocyanin biosynthetic pathway in the peel of tomato fruit at the fully ripened stage. Transcriptional profiling of these genes was determined by qRT-PCR in the fruit peel of *Aft/Aft ATV/ATV* (abbreviated as *Aft/Aft*) and *Aft/Aft atv/atv* in a F5 population, and the two parent lines Heinz1706 (genotype, *AFT/AFT ATV/ATV*) and Indigo Rose (*Aft/Aft atv/atv*). A tomato *ACTIN* (*Solyc03g078400*) gene was used as the reference: relative expression levels are shown. Different letters indicate statistically significant differences among groups (Tukey's honestly significant difference test,  $P < 0.01$ ). PAL, phenyl alanine ammonia-lyase; C4H, cinnamate-4-hydroxylase; 4CL, 4-coumaroyl:CoA-ligase; CHS, chalcone synthase; CHI, chalcone isomerase; CHI-LIKE, chalcone isomerase-like; F3H, flavanone 3-hydroxylase; F3'5'H, flavonoid 3'5'-hydroxylase; DFR, dihydroflavonol 4-reductase; ANS, leucoanthocyanidin dioxygenase; 3-GT, 3-O-glucosyltransferase; RT, rhamnosyl transferase; AAC, anthocyanin acyltransferase; 5-GT, 5-O-glucosyltransferase; PAT, putative anthocyanin transporter; GST, glutathione S-transferase; F3'H, flavonoid 3'-hydroxylase; FLS, flavonol synthase.

**Table S1.** General information on the DNA markers used in this study

| Marker name | Genome position        | Forward primer             | Reverse primer            | Marker type | Restriction enzyme | Heinz1706 allele (bp) | Indigo Rose allele (bp) |
|-------------|------------------------|----------------------------|---------------------------|-------------|--------------------|-----------------------|-------------------------|
| ATV-In      | SL2.50ch07: 61,003,572 | GAGGTTTCTTCGTTGGTAGTC      | CTAAATAAAAGTTATTGAGTTCACG | InDel       |                    | 85                    | 89                      |
| HP1865      | SL2.50ch07: 25,351,236 | TTATGCCAAAGCTTCAACGG       | ACGAGTTTATTTAAGTTTCCTTG   | InDel       |                    | 158                   | 176                     |
| HP1877      | SL2.50ch07: 59,804,770 | CACGGGAATAAGAAATTGGCG      | TGGTTGACTCTTGAAGTTTCAGT   | InDel       |                    | 148                   | 171                     |
| HP1885      | SL2.50ch07: 62,676,901 | AGGTACTTGTGACCAAACCC       | TTCAGCATGAACTGACTGGG      | InDel       |                    | 136                   | 157                     |
| HP1891      | SL2.50ch07: 64,799,803 | AGCTTTGCTAAGACATACTAAGAC   | ACTGTTTTCGATAGATCCTCGG    | InDel       |                    | 151                   | 137                     |
| HP1915      | SL2.50ch07: 60,726,148 | CTTAAGAAGGAAGTATGAAGAGAG   | CCATCAATCATAGTTTCACCG     | InDel       |                    | 97                    | 108                     |
| HP1917      | SL2.50ch07: 60,982,128 | TCACAAGTAAAGGAGCATCC       | CTCTTCTTATAGTCACGTAAGTTAG | InDel       |                    | 138                   | 117                     |
| HP1919      | SL2.50ch07: 61,321,298 | CTCTCAACGATTCTATCTTCAC     | CCCAATTTGATATCTGAACC      | InDel       |                    | 119                   | 132                     |
| HP1949      | SL2.50ch10: 65,012,425 | TGTGGCACCTCCACCGTAAC       | CCGCATGACCTATAAGCGAC      | InDel       |                    | 124                   | 154                     |
| HP1953      | SL2.50ch10: 65,134,020 | TTCTTAGTAACCGCGATGCTC      | GACTTTGCTCCAGATGAAGTG     | InDel       |                    | 768                   | 376                     |
| HP2675      | SL2.50ch07: 60,920,438 | CTGTTGATGGTAAACACTTTTCTC   | CAAAAGTTTCATAAAAAGCAGACC  | InDel       |                    | 148                   | 160                     |
| HP2677      | SL2.50ch07: 61,044,268 | GTGTTACCAAAAAAAGGAAAAGTG   | GATCATTGCTTCTAGAAATAGGC   | InDel       |                    | 131                   | 143                     |
| HP3195      | SL2.50ch10: 65,177,657 | GAGTAAACATATAAGCATTCCTTTG  | CAATCACTAAGTAGTTGTTGCTCA  | InDel       |                    | 89                    | 69                      |
| HP3217      | SL2.50ch07: 61,013,666 | ACATTGGTGGCATTGAATATGAG    | ACAAGTATCACCCATCCGTCTC    | InDel       |                    | 200                   | 236                     |
| JP13        | SL2.50ch07: 60,995,265 | CTGGTATAATCTCCCTTTAGCG     | AAGGTCTAAGAAAAGCTGACAAC   | CAPS        | MseI               | 176                   | 128                     |
| JP17        | SL2.50ch07: 61,004,897 | GTTGTATAAGGCGGAGTGATGGCGAC | GCATCTGCGCATATTCTCTTC     | dCAPS       | Hinfl              | 148                   | 172                     |

**Table S2.** Primers used for sequencing and cDNA cloning

| Primer Name   | Forward primer (5'->3')                                      | Reverse primer (5'->3')                       | Notes                              |
|---------------|--------------------------------------------------------------|-----------------------------------------------|------------------------------------|
| ATVg-1        | CCGAAGTTAACAATAACACGAAC                                      | CGAGATCGGATCTATCTCATCA                        | Sequencing <i>SIMYBATV</i> gene    |
| ATVg-2        | ATATCGACAAAGTTGTATAATGTACTAT                                 | CAACTTTCCAATTATACACACTCG                      | Sequencing <i>SIMYBATV</i> gene    |
| ATVg-3        | AGCAATTGTTTCGAGGAGAGG                                        | CTTTCAGAAGTTCGTGTATCTTGC                      | Sequencing <i>SIMYBATV</i> gene    |
| ATVg-4        | GTAAATGTGAAGATCCTGAAATGAC                                    | ATGATATGATTATCTGCGTCTAACC                     | Sequencing <i>SIMYBATV</i> gene    |
| ATVg-5        | GAACATGTATTTTGGGAAGTAGCC                                     | CTTCTCGCACCTCTTCACTG                          | Sequencing <i>SIMYBATV</i> gene    |
| ATVg-6        | GCATGTTCGAGTTAATGAGGATG                                      | AAGGAAGTAGTGAAATCCTACAAG                      | Sequencing <i>SIMYBATV</i> gene    |
| ATVg-7        | GGGTTTGGGCTCATTGGTGT                                         | AGGATCAGAAATTAAGTTGCCAC                       | Sequencing <i>SIMYBATV</i> gene    |
| 3RACE-RT      | AAGCAGTGGTATCAACGCAGAGTACTTTTTTTTTTTTTTTTTTTTTTTTTTTTTTTTTVN |                                               | 3'-RACE CDS Primer, Clontech       |
| SIAN2         | GAATACTCCTATGTGTGCATCG                                       | CCAACTAAGGATATGTCATAGTAATAAG                  | Cloning <i>SIAN2</i> cDNA          |
| SIAN2-like    | TGCAGTATTTGTGACTTAACATATC                                    | GGTATTGTAGTACTACTTGTACTAGCA                   | Cloning <i>SIAN2-like</i> cDNA     |
| SIMYB76       | CTTCTTCACATAGTCACCATCC                                       | AAGCAGTGGTATCAACGCAGAGT (3RACE-NUP, Clontech) | Cloning <i>SIMYBATV</i> -like cDNA |
| SIMYBATV      | GACCACATTCAAATCTTTGTTC                                       | AAGCAGTGGTATCAACGCAGAGT (3RACE-NUP, Clontech) | Cloning <i>SIMYBATV</i> -like cDNA |
| SIMYBATV-like | TGCCAAGTTATTTCCATCTC                                         | AAGCAGTGGTATCAACGCAGAGT (3RACE-NUP, Clontech) | Cloning <i>SIMYBATV</i> -like cDNA |
| SITRY         | CAGAAGCTGTCCCTCCTAATC                                        | GCAACTCTCTGCTAGTCCTCT                         | Cloning <i>SITRY</i> cDNA          |

**Table S3.** Information regarding the known MYB repressors for the phenylpropanoid and flavonoid pathway

| Name     | Full Name                                             | Type     | GenBank Accession Number | Reference                                               |
|----------|-------------------------------------------------------|----------|--------------------------|---------------------------------------------------------|
| AmMYB308 | <i>Antirrhinum majus</i> MYB308                       | R2R3 MYB | P81393                   | Jackson <i>et al.</i> , 1991                            |
| AtCPC    | <i>Arabidopsis thaliana</i> CAPRICE                   | R3 MYB   | BAA21917                 | Wada <i>et al.</i> , 1997                               |
| AtETC1   | <i>Arabidopsis thaliana</i> Enhancer of TRY and CPC 1 | R3 MYB   | NP_171645                | Kirik <i>et al.</i> , 2004a                             |
| AtETC2   | <i>Arabidopsis thaliana</i> Enhancer of TRY and CPC 2 | R3 MYB   | NP_850145                | Kirik <i>et al.</i> , 2004b                             |
| AtETC3   | <i>Arabidopsis thaliana</i> Enhancer of TRY and CPC 2 | R3 MYB   | NP_192015                | Simon <i>et al.</i> , 2007                              |
| AtMYB3   | <i>Arabidopsis thaliana</i> MYB3                      | R2R3 MYB | Q9S9K9                   | Kranz <i>et al.</i> , 1998                              |
| AtMYB4   | <i>Arabidopsis thaliana</i> MYB4                      | R2R3 MYB | Q9SZP1                   | Kranz <i>et al.</i> , 1998                              |
| AtMYB7   | <i>Arabidopsis thaliana</i> MYB7                      | R2R3 MYB | NP_179263                | Fornale <i>et al.</i> , 2014                            |
| AtMYB32  | <i>Arabidopsis thaliana</i> MYB32                     | R2R3 MYB | O49608                   | Preston <i>et al.</i> , 2004                            |
| AtMYBL2  | <i>Arabidopsis thaliana</i> MYB-Like 2                | R3 MYB   | AEE35154                 | Dubos <i>et al.</i> , 2008; Matsui <i>et al.</i> , 2008 |
| AtTRY    | <i>Arabidopsis thaliana</i> TRIPTYCHON                | R3 MYB   | Q8GV05                   | Schnittger <i>et al.</i> , 1999                         |
| CmMYB1   | <i>Chrysanthemum x morifolium</i> MYB1                | R2R3 MYB | AEO27497.1               | Zhu <i>et al.</i> , 2013                                |
| EcROI1   | <i>Erythranthe cardinalis</i> rose intensity 1        | R3 MYB   | AGC66792.1               | Yuan <i>et al.</i> , 2013                               |
| EgMYB1   | <i>Eucalyptus gunnii</i> MYB1                         | R2R3 MYB | CAE09058.1               | Legay <i>et al.</i> , 2010                              |
| EIROI1   | <i>Erythranthe lewisii</i> rose intensity 1           | R3 MYB   | AGC66791.1               | Yuan <i>et al.</i> , 2013                               |
| FaMYB1   | <i>Fragaria x ananassa</i> MYB1                       | R2R3 MYB | AAK84064                 | Aharoni <i>et al.</i> , 2001                            |
| GbMYBF2  | <i>Ginkgo biloba</i> MYBF2                            | R2R3 MYB | AFD36431                 | Xu <i>et al.</i> , 2014                                 |
| GhMYB6   | <i>Gossypium hirsutum</i> MYB6                        | R2R3 MYB | AAN28286                 | Cedroni <i>et al.</i> , 2003                            |
| GmMYB73  | <i>Glycine max</i> MYB73                              | R3 MYB   | ABH02868                 | Liu <i>et al.</i> , 2014                                |
| GmMYB100 | <i>Glycine max</i> MYB100                             | R2R3 MYB | Glyma07g33960.1          | Yan <i>et al.</i> , 2015                                |
| LIMYB1   | <i>Leucaena leucocephala</i> MYB1                     | R2R3 MYB | ADY38393                 | Omer <i>et al.</i> , 2013                               |
| MdMYB6   | <i>Malus domestica</i> MYB6                           | R2R3 MYB | AAZ20429                 | Gao <i>et al.</i> , 2011                                |
| MdMYB10  | <i>Malus domestica</i> MYB10                          | R2R3 MYB | ACQ45201                 | Lin-Wang <i>et al.</i> , 2011                           |
| MtMYB2   | <i>Medicago truncatula</i> MYB2                       | R2R3 MYB | AES99346                 | Jun <i>et al.</i> , 2015                                |
| PdMYB221 | <i>Populus trichocarpa</i> MYB221                     | R2R3 MYB | ACN97176                 | Tang <i>et al.</i> , 2015                               |
| PhMYB4   | <i>Petunia x hybrid</i> MYB4                          | R2R3 MYB | ADX33331                 | Colquhoun <i>et al.</i> , 2011                          |
| PhMYB27  | <i>Petunia x hybrid</i> MYB27                         | R2R3 MYB | AHX24372                 | Albert <i>et al.</i> , 2011                             |

|             |                                                     |          |                |                                 |
|-------------|-----------------------------------------------------|----------|----------------|---------------------------------|
| PhMYBx      | <i>Petunia x hybrid</i> MYBx                        | R3 MYB   | AHX24371       | Kroon, 2004                     |
| PpMYB17     | <i>Prunus persica</i> MYB17                         | R2R3 MYB | ALO81020       | Zhou <i>et al.</i> , 2016       |
| PpMYB18     | <i>Prunus persica</i> MYB18                         | R2R3 MYB | ALO81021       | Zhou <i>et al.</i> , 2016       |
| PpMYB19     | <i>Prunus persica</i> MYB19                         | R2R3 MYB | ALO81022       | Zhou <i>et al.</i> , 2016       |
| PpMYB20     | <i>Prunus persica</i> MYB20                         | R2R3 MYB | ALO81023       | Zhou <i>et al.</i> , 2016       |
| PtrMYB57    | <i>Populus trichocarpa</i> MYB57                    | R2R3 MYB | XP_002325733   | Wan <i>et al.</i> , 2017        |
| PtrMYB182   | <i>Populus tremula x Populus tremuloides</i> MYB182 | R2R3 MYB | AJI76863       | Yoshida <i>et al.</i> , 2015    |
| Tr-MYB133   | <i>Trifolium repens</i> MYB133                      | R2R3 MYB | AMB27081       | Albert, 2015                    |
| Tr-MYB134   | <i>Trifolium repens</i> MYB134                      | R2R3 MYB | AMB27082       | Albert, 2015                    |
| VvMYBC2-L1  | <i>Vitis vinifera</i> MYBC2-Like 1                  | R2R3 MYB | ABW34393       | Huang <i>et al.</i> , 2014      |
| VvMYBC2-L2  | <i>Vitis vinifera</i> MYBC2-Like 2                  | R2R3 MYB | ACX50288       | Cavallini <i>et al.</i> , 2015  |
| VvMYBC2-L3  | <i>Vitis vinifera</i> MYBC2-Like 3                  | R2R3 MYB | AIP98385       | Cavallini <i>et al.</i> , 2015  |
| VvMYB4a     | <i>Vitis vinifera</i> MYB4a                         | R2R3 MYB | ABL61515       | Jun <i>et al.</i> , 2015        |
| VvMYB4-like | <i>Vitis vinifera</i> MYB4-like                     | R2R3 MYB | XP_002273328.1 | Perez-Diaz <i>et al.</i> , 2016 |
| VvTRY       | <i>Vitis vinifera</i> TRIPTYCHON                    | R3 MYB   | ABW34395       | Jun <i>et al.</i> , 2015        |
| ZmMYB31     | <i>Zea mays</i> MYB31                               | R2R3 MYB | NP_001105949   | Fornale <i>et al.</i> , 2010    |
| ZmMYB42     | <i>Zea mays</i> MYB42                               | R2R3 MYB | NP_001106009   | Sonbol <i>et al.</i> , 2009     |

---

**Table S4.** Primers for quantitative RT-PCR

| Gene name          | Gene ID               | Forward primer              | Reverse primer               | Reference                    |
|--------------------|-----------------------|-----------------------------|------------------------------|------------------------------|
| <i>3GT</i>         | <i>Solyc10g083440</i> | CGATCGAACGACGAAACTG         | GCAGCATAGATGGCATTGGC         | Developed in this study      |
| <i>4CL</i>         | <i>Solyc06g068650</i> | TTCACCTCAGGGATATCATGCTCATC  | CATGTGAACAAGGTGAAGGATTATGC   | Developed in this study      |
| <i>5GT</i>         | <i>Solyc09g092500</i> | GTGGCATTTCCTCATTGGAC        | TCATCACTCTCAACCACACCA        | Qiu <i>et al.</i> , 2016     |
| <i>AAC</i>         | <i>Solyc12g088170</i> | CTTGCTGGAAGGTTGTCTGAAGATG   | CAAGGTCACTATCTTTGTATGCTTTGTC | Developed in this study      |
| <i>ANS</i>         | <i>Solyc08g080040</i> | GAACTAGCACTTGGCGTCGAA       | TTGCAAGCCAGGCACCATA          | Qiu <i>et al.</i> , 2016     |
| <i>C4H</i>         | <i>Solyc05g047530</i> | AAGAAGGAACTAATGGCTGAAA      | GCTGCAACATTGATATTCTCCA       | Developed in this study      |
| <i>CHI</i>         | <i>Solyc05g010320</i> | CGGCGCAGGGAATAGAGGTTT       | CCGTCAAGGGCAAGATCATAGTCAC    | Developed in this study      |
| <i>CHI-LIKE</i>    | <i>Solyc05g052240</i> | TTGATGGGCCATGGAATAACAGATA   | GTCAACTGGAGCATTACAATAGCCT    | Developed in this study      |
| <i>CHS1</i>        | <i>Solyc09g091510</i> | TGGTCACCGTGGAGGAGTATC       | GATCGTAGCTGGACCCTCTGC        | Povero <i>et al.</i> , 2011  |
| <i>CHS2</i>        | <i>Solyc05g053550</i> | GGCGACTCCTTCGAACTGTGTTG     | ATCCAAAGAAGGAGCCATGTATTAC    | Developed in this study      |
| <i>DFR</i>         | <i>Solyc02g085020</i> | AGTCCAAGGATCCAGAGAACGAAGTA  | TGGACATCAAGAGTTCCAGCAGAT     | Developed in this study      |
| <i>F3'5'H</i>      | <i>Solyc11g066580</i> | GGTACATGTGGGATGGTTGTTGC     | ACTTCCAACGTGGTCCATAGGG       | Developed in this study      |
| <i>F3'H</i>        | <i>Solyc03g115220</i> | ACCACCATTAACTTGAACCTCCTCC   | GCCATGTCCGACAGGAAGAAG        | Developed in this study      |
| <i>F3H</i>         | <i>Solyc02g083860</i> | GTGAAAAGTTGATGGATTTGGC      | GTAATGGTTCCTGGATCGGTGTGT     | Qiu <i>et al.</i> , 2016     |
| <i>FLS</i>         | <i>Solyc11g013110</i> | CATACAGGGAAGCAAAATGAGGAA    | AGTATGAGCCACAACCTCCAAGAGC    | Developed in this study      |
| <i>GST</i>         | <i>Solyc02g081340</i> | TGCTTTTACAGCCATTTGGACAGG    | CCGGTTAGTTTCTTTCCCTTGTCTTC   | Developed in this study      |
| <i>PAL</i>         | <i>Solyc03g071870</i> | GGTGGTGCTCTTCAAAAGGAAC      | GGAATGCTTCATGAGCGTCAAGTT     | Developed in this study      |
| <i>PAL5</i>        | <i>Solyc09g007900</i> | GGAATTGCAGGGTTGCCACTTT      | AAGGCCGCGTTGCCTAAAGAAG       | Povero <i>et al.</i> , 2011  |
| <i>PAT</i>         | <i>Solyc03g025190</i> | CGGTGTTTCAGTCCCTCCTA        | TTGCATCTCCTTGCTGTTTG         | Povero <i>et al.</i> , 2011  |
| <i>RT</i>          | <i>Solyc09g059170</i> | CTGGCAATGCAAACAGAGTGA       | TCGACTTGCGGAAGAGTGAGA        | Qiu <i>et al.</i> , 2016     |
| <i>SIACTIN</i>     | <i>Solyc03g078400</i> | GGGATGGAGAAGTTTGGTGGTGG     | CTTCGACCAAGGGATGGTGTAGC      | Qiu <i>et al.</i> , 2016     |
| <i>SIAN1</i>       | <i>Solyc09g065100</i> | CTAAGAGTGCCCGCATAACAGAC     | ATCCGAAGTGGAGTGCTCAGATA      | Qiu <i>et al.</i> , 2016     |
| <i>SIAN2</i>       | <i>Solyc10g086250</i> | CCAGCTCTAGCAGGAACAAGATG     | AACTCTTAGGCAATAGGTGGTCACT    | Developed in this study      |
| <i>SIAN2-like</i>  | <i>Solyc10g086290</i> | CAAGCTTCTAGGCAATAGATGGTCACT | TTGGTCGTGGTCGTAGTATAGTGC     | Developed in this study      |
| <i>SIAN11</i>      | <i>Solyc03g097340</i> | CCGTCTCTGGGATGTTACTGATACT   | CTTCTCGGCTCCACTTCATTCC       | Developed in this study      |
| <i>SIANT1</i>      | <i>Solyc10g086260</i> | AAGCTCTTAGGCAACAGATGGTCAC   | TGAGAAATACTTGCGTCGTTGAGG     | Developed in this study      |
| <i>SIANT1-like</i> | <i>Solyc10g086270</i> | AGGTGACTTCGCTTCGGATGA       | CGTTTACTCTTAAACTTTTCACGTGG   | Developed in this study      |
| <i>SIJAF13</i>     | <i>Solyc08g081140</i> | TCAGGGGATCACTACCGAAC        | TCCCATCAAGGTTGGAAGAC         | Kiferle <i>et al.</i> , 2015 |
| <i>SIMYB3</i>      | <i>Solyc06g065100</i> | AGCTGCAGGATTGTCAAGATGTG     | GAGCACGTATATAATTGATGAGGCCG   | Developed in this study      |
| <i>SIMYB7</i>      | <i>Solyc01g111500</i> | CCTCCTTGGTAAACAAATGGTCACT   | TTGGATCAATGCCCCGACTC         | Developed in this study      |



|                      |                       |                              |                              |                         |
|----------------------|-----------------------|------------------------------|------------------------------|-------------------------|
| <i>SIMYB12</i>       | <i>Solyc01g079620</i> | ATGCCGGATTATTGAGATGCG        | GCTATCAACTTTTCGACTTAGATGAGAG | Developed in this study |
| <i>SIMYB32</i>       | <i>Solyc10g055410</i> | ACAAGTGGTCGCTTATAGCAGGAA     | TCATGAGCAGCAGCAAAAGTAATC     | Developed in this study |
| <i>SIMYB76</i>       | <i>Solyc05g008250</i> | CTGCTGGCCTGCTTCGTTGT         | CCGTTTCGTCCTGGCAATCTTC       | Developed in this study |
| <i>SIMYBATV-like</i> | <i>Solyc12g005800</i> | CCTTCATAGACTCCCCTCCATTTG     | GACCACCTCTCACCAACCAAGTT      | Developed in this study |
| <i>SIMYBATV-X1</i>   | <i>Solyc07g052490</i> | TCAGCTTGGTTAGAGAGAGGTTG      | AAAACACACTGCTGAGGGTGC        | Developed in this study |
| <i>SIMYBATV-X2</i>   | <i>Solyc07g052490</i> | TCAGCTTGGTTAGAGAGAGGTTG      | CGCTAGATTTTCGCGTTGTTGA       | Developed in this study |
| <i>SIMYBATV-X3</i>   | <i>Solyc07g052490</i> | TCAGCTTGGTTAGAGAGAGGTTG      | CATCTGAGGGAAAAAGTAATTTGAAG   | Developed in this study |
| <i>SITRY</i>         | <i>Solyc01g095640</i> | GCAGCCATGAAGAAGAGGTTAATAGTAT | TATAAGCCCCCACCTGTCTCCA       | Developed in this study |

---

**Table S5.** Preliminary mapping of the *atv* locus

| HP1865 <sup>a</sup> | HP1877 | HP1885 | HP1891 | Plant number <sup>b</sup> | Fruit color <sup>c</sup> |
|---------------------|--------|--------|--------|---------------------------|--------------------------|
| 3                   | 3      | 3      | 3      | 7                         | Fully purple             |
| 1                   | 2      | 3      | 3      | 1                         | Fully purple             |
| 1                   | 3      | 3      | 3      | 1                         | Fully purple             |
| 2                   | 2      | 3      | 3      | 2                         | Fully purple             |
| 2                   | 3      | 2      | 2      | 4                         | Fully purple             |
| 2                   | 3      | 3      | 2      | 1                         | Fully purple             |
| 2                   | 3      | 3      | 3      | 3                         | Fully purple             |
| 3                   | 3      | 2      | 2      | 2                         | Fully purple             |
| 3                   | 3      | 3      | 2      | 3                         | Fully purple             |
| 1                   | 1      | 1      | 1      | 12                        | Purple spots             |
| 2                   | 2      | 2      | 2      | 25                        | Purple spots             |
| 1                   | 1      | 1      | 2      | 3                         | Purple spots             |
| 1                   | 1      | 1      | 3      | 1                         | Purple spots             |
| 1                   | 1      | 2      | 2      | 6                         | Purple spots             |
| 1                   | 1      | 2      | 3      | 1                         | Purple spots             |
| 1                   | 2      | 1      | 1      | 1                         | Purple spots             |
| 1                   | 2      | 2      | 2      | 2                         | Purple spots             |
| 1                   | 2      | 2      | 3      | 1                         | Purple spots             |
| 1                   | 2      | 3      | 3      | 4                         | Purple spots             |
| 2                   | 1      | 1      | 1      | 7                         | Purple spots             |
| 2                   | 1      | 2      | 2      | 1                         | Purple spots             |
| 2                   | 2      | 1      | 1      | 9                         | Purple spots             |
| 2                   | 2      | 2      | 1      | 3                         | Purple spots             |
| 2                   | 2      | 2      | 3      | 3                         | Purple spots             |
| 2                   | 2      | 3      | 2      | 1                         | Purple spots             |
| 2                   | 2      | 3      | 3      | 3                         | Purple spots             |
| 3                   | 1      | 1      | 1      | 3                         | Purple spots             |
| 3                   | 2      | 1      | 1      | 1                         | Purple spots             |
| 3                   | 2      | 2      | 1      | 1                         | Purple spots             |
| 3                   | 2      | 2      | 2      | 4                         | Purple spots             |
| 3                   | 2      | 2      | 3      | 1                         | Purple spots             |
| 3                   | 3      | 2      | 2      | 4                         | Purple spots             |

a Marker score on parent plant: 1, homozygous Heinz1706; 2, heterozygous; 3, homozygous Indigo Rose.

b The number of plants with same phenotype and genotype.

c Purple spots or Fully purple was exhibited on the fruit peel which was exposed to high light.

## Reference

- Aharoni A, De Vos CH, Wein M, Sun Z, Greco R, Kroon A, Mol JN, O'Connell AP.** 2001. The strawberry FaMYB1 transcription factor suppresses anthocyanin and flavonol accumulation in transgenic tobacco. *Plant Journal* **28**, 319-332.
- Albert NW.** 2015. Subspecialization of R2R3-MYB Repressors for Anthocyanin and Proanthocyanidin Regulation in Forage Legumes. *Front Plant Sci* **6**, 1165.
- Albert NW, Lewis DH, Zhang H, Schwinn KE, Jameson PE, Davies KM.** 2011. Members of an R2R3-MYB transcription factor family in *Petunia* are developmentally and environmentally regulated to control complex floral and vegetative pigmentation patterning. *Plant Journal* **65**, 771-784.
- Cavallini E, Matus JT, Finezzo L, Zenoni S, Loyola R, Guzzo F, Schlechter R, Ageorges A, Arce-Johnson P, Tornielli GB.** 2015. The Phenylpropanoid Pathway Is Controlled at Different Branches by a Set of R2R3-MYB C2 Repressors in Grapevine. *Plant Physiology* **167**, 1448-1470.
- Cedroni ML, Cronn RC, Adams KL, Wilkins TA, Wendel JF.** 2003. Evolution and expression of MYB genes in diploid and polyploid cotton. *Plant Molecular Biology* **51**, 313-325.
- Colquhoun TA, Kim JY, Wedde AE, Levin LA, Schmitt KC, Schuurink RC, Clark DG.** 2011. PhMYB4 fine-tunes the floral volatile signature of *Petunia x hybrida* through PhC4H. *Journal of Experimental Botany* **62**, 1133-1143.
- Dubos C, Le Gourrierec J, Baudry A, Huet G, Lanet E, Debeaujon I, Routaboul JM, Alboresi A, Weisshaar B, Lepiniec L.** 2008. MYBL2 is a new regulator of flavonoid biosynthesis in *Arabidopsis thaliana*. *Plant Journal* **55**, 940-953.
- Fornale S, Lopez E, Salazar-Henao JE, Fernandez-Nohales P, Rigau J, Caparros-Ruiz D.** 2014. AtMYB7, a new player in the regulation of UV-screens in *Arabidopsis thaliana*. *Plant and Cell Physiology* **55**, 507-516.
- Fornale S, Shi X, Chai C, Encina A, Irar S, Capellades M, Fuguet E, Torres JL, Rovira P, Puigdomenech P, Rigau J, Grotewold E, Gray J, Caparros-Ruiz D.** 2010. ZmMYB31 directly represses maize lignin genes and redirects the phenylpropanoid metabolic flux. *Plant Journal* **64**, 633-644.
- Gao JJ, Shen XF, Zhang Z, Peng RH, Xiong AS, Xu J, Zhu B, Zheng JL, Yao QH.** 2011. The myb transcription factor MdMYB6 suppresses anthocyanin biosynthesis in transgenic *Arabidopsis*. *Plant Cell Tissue and Organ Culture* **106**, 235-242.
- Huang YF, Vialet S, Guiraud JL, Torregrosa L, Bertrand Y, Cheynier V, This P, Terrier N.** 2014. A negative MYB regulator of proanthocyanidin accumulation, identified through expression quantitative locus mapping in the grape berry. *New Phytologist* **201**, 795-809.
- Jackson D, Culianez-Macia F, Prescott AG, Roberts K, Martin C.** 1991. Expression patterns of myb genes from *Antirrhinum* flowers. *Plant Cell* **3**, 115-125.
- Jun JH, Liu CG, Xiao XR, Dixon RA.** 2015. The Transcriptional Repressor MYB2 Regulates Both Spatial and Temporal Patterns of Proanthocyanidin and Anthocyanin Pigmentation in *Medicago truncatula*. *Plant Cell* **27**, 2860-2879.
- Kiferle, C., Fantini, E., Bassolino, L., Povero, G., Spelt, C., Buti, S., Giuliano, G., Quattrocchio, F., Koes, R., Perata, P., and Gonzali, S.** 2015, Tomato R2R3-MYB Proteins SIAN1 and SIAN2: Same Protein Activity, Different Roles. *PLoS ONE* **10**, e0136365.
- Kirik V, Simon M, Huelskamp M, Schiefelbein J.** 2004a. The ENHANCER OF TRY AND CPC1 gene acts redundantly with TRIPTYCHON and CAPRICE in trichome and root hair cell patterning in *Arabidopsis*. *Developmental Biology* **268**, 506-513.

- Kirik V, Simon M, Wester K, Schiefelbein J, Hulskamp M.** 2004b. ENHANCER of TRY and CPC 2 (ETC2) reveals redundancy in the region-specific control of trichome development of Arabidopsis. *Plant Molecular Biology* **55**, 389-398.
- Kranz HD, Denekamp M, Greco R, Jin H, Leyva A, Meissner RC, Petroni K, Urzainqui A, Bevan M, Martin C, Smeekens S, Tonelli C, Paz-Ares J, Weisshaar B.** 1998. Towards functional characterisation of the members of the R2R3-MYB gene family from Arabidopsis thaliana. *Plant Journal* **16**, 263-276.
- Kroon A.** 2004. Transcription Regulation of the Anthocyanin Pathway in Petunia hybrida. *PhD dissertation (Amsterdam: Vrije Universiteit)*.
- Larkin MA, Blackshields G, Brown NP, Chenna R, McGettigan PA, McWilliam H, Valentin F, Wallace IM, Wilm A, Lopez R, Thompson JD, Gibson TJ, Higgins DG.** 2007. Clustal W and Clustal X version 2.0. *Bioinformatics* **23**, 2947-2948
- Legay S, Sivadon P, Blervacq AS, Pavy N, Baghdady A, Tremblay L, Levasseur C, Ladouce N, Lapierre C, Seguin A, Hawkins S, Mackay J, Grima-Pettenati J.** 2010. EgMYB1, an R2R3 MYB transcription factor from eucalyptus negatively regulates secondary cell wall formation in Arabidopsis and poplar. *New Phytologist* **188**, 774-786.
- Lin-Wang K, Micheletti D, Palmer J, Volz R, Lozano L, Espley R, Hellens RP, Chagne D, Rowan DD, Troglio M, Iglesias I, Allan AC.** 2011. High temperature reduces apple fruit colour via modulation of the anthocyanin regulatory complex. *Plant Cell and Environment* **34**, 1176-1190.
- Liu YF, Li QT, Lu X, Song QX, Lam SM, Zhang WK, Ma B, Lin Q, Man WQ, Du WG, Shui GH, Chen SY, Zhang JS.** 2014. Soybean GmMYB73 promotes lipid accumulation in transgenic plants. *BMC Plant Biology* **14**, 73.
- Matsui K, Umemura Y, Ohme-Takagi M.** 2008. AtMYBL2, a protein with a single MYB domain, acts as a negative regulator of anthocyanin biosynthesis in Arabidopsis. *Plant Journal* **55**, 954-967.
- Nicholas KB, Nicholas HBJ, Deerfield DWI.** 1997. GeneDoc: analysis and visualization of genetic variation. *EMBNEWNEWS* **4**, 14.
- Omer S, Kumar S, Khan BM.** 2013. Over-expression of a subgroup 4 R2R3 type MYB transcription factor gene from *Leucaena leucocephala* reduces lignin content in transgenic tobacco. *Plant Cell Rep* **32**, 161-171.
- Perez-Diaz JR, Perez-Diaz J, Madrid-Espinoza J, Gonzalez-Villanueva E, Moreno Y, Ruiz-Lara S.** 2016. New member of the R2R3-MYB transcription factors family in grapevine suppresses the anthocyanin accumulation in the flowers of transgenic tobacco. *Plant Molecular Biology* **90**, 63-76.
- Povero, G., Gonzali, S., Bassolino, L., Mazzucato, A., & Perata, P.** 2011. Transcriptional analysis in high-anthocyanin tomatoes reveals synergistic effect of Aft and atv genes. *Journal of plant physiology*, **168(3)**, 270-279.
- Preston J, Wheeler J, Heazlewood J, Li SF, Parish RW.** 2004. AtMYB32 is required for normal pollen development in Arabidopsis thaliana. *Plant Journal* **40**, 979-995.
- Qiu Z, Wang X, Gao J, Guo Y, Huang Z, Du Y.** 2016. The Tomato *Hoffman's Anthocyaninless* Gene Encodes a bHLH Transcription Factor Involved in Anthocyanin Biosynthesis That Is Developmentally Regulated and Induced by Low Temperatures. *PloS ONE* **11**, e0151067.
- Schnittger A, Folkers U, Schwab B, Jurgens G, Hulskamp M.** 1999. Generation of a spacing pattern: the role of triptychon in trichome patterning in Arabidopsis. *Plant Cell* **11**, 1105-1116.
- Simon M, Lee MM, Lin Y, Gish L, Schiefelbein J.** 2007. Distinct and overlapping roles of single-repeat MYB genes in root epidermal patterning. *Developmental Biology* **311**, 566-578.
- Sonbol FM, Fornale S, Capellades M, Encina A, Tourino S, Torres JL, Rovira P, Ruel K, Puigdomenech P, Rigau J, Caparros-Ruiz D.** 2009. The maize ZmMYB42 represses the phenylpropanoid pathway and affects the cell wall structure, composition and degradability in Arabidopsis thaliana. *Plant Molecular Biology* **70**, 283-296.

- Tang XF, Zhuang YM, Qi G, Wang D, Liu HH, Wang KR, Chai GH, Zhou GK.** 2015. Poplar PdMYB221 is involved in the direct and indirect regulation of secondary wall biosynthesis during wood formation. *Scientific Reports* **5**, 12240.
- Wada T, Tachibana T, Shimura Y, Okada K.** 1997. Epidermal cell differentiation in Arabidopsis determined by a Myb homolog, CPC. *Science* **277**, 1113-1116.
- Wan S, Li C, Ma X, Luo K.** 2017. PtrMYB57 contributes to the negative regulation of anthocyanin and proanthocyanidin biosynthesis in poplar. *Plant Cell Rep.***36**, 1263-1276.
- Xu F, Ning YJ, Zhang WW, Liao YL, Li LL, Cheng H, Cheng SY.** 2014. An R2R3-MYB transcription factor as a negative regulator of the flavonoid biosynthesis pathway in Ginkgo biloba. *Functional & Integrative Genomics* **14**, 177-189.
- Yan JH, Wang B, Zhong YP, Yao LM, Cheng LJ, Wu TL.** 2015. The soybean R2R3 MYB transcription factor GmMYB100 negatively regulates plant flavonoid biosynthesis. *Plant Molecular Biology* **89**, 35-48.
- Yoshida K, Ma DW, Constabel CP.** 2015. The MYB182 Protein Down-Regulates Proanthocyanidin and Anthocyanin Biosynthesis in Poplar by Repressing Both Structural and Regulatory Flavonoid Genes. *Plant Physiology* **167**, 693-710.
- Yuan YW, Sagawa JM, Young RC, Christensen BJ, Bradshaw HD.** 2013. Genetic Dissection of a Major Anthocyanin QTL Contributing to Pollinator-Mediated Reproductive Isolation Between Sister Species of Mimulus. *Genetics* **194**, 255-263.
- Zhou H, Peng Q, Zhao JB, Owiti A, Ren F, Liao L, Wang L, Deng XB, Jiang Q, Han YP.** 2016. Multiple R2R3-MYB Transcription Factors Involved in the Regulation of Anthocyanin Accumulation in Peach Flower. *Front Plant Sci* **7**, 1557.
- Zhu L, Shan H, Chen S, Jiang J, Gu C, Zhou G, Chen Y, Song A, Chen F.** 2013. The Heterologous Expression of the Chrysanthemum R2R3-MYB Transcription Factor CmMYB1 Alters Lignin Composition and Represses Flavonoid Synthesis in Arabidopsis thaliana. *PLoS One* **8**, e65680.
